# Supplementary material
Source: HighWire-hosted journal article supplement (https://jnm.snmjournals.org/highwire/filestream/99569/field_highwire_adjunct_files/0/257402_Supplemental_Data.pdf)
Supplement: 257402_Supplemental_Data.pdf [file 257402_Supplemental_Data.pdf]

Supplemental Table 1: Human doses from <sup>11</sup>C-labeled tracers.

| Target                    | Tracer          | ED<br>( $\mu$ SV/MBq) | Critical organ     | Critical organ dose<br>( $\mu$ SV/MBq) | Number of subjects | Reference |
|---------------------------|-----------------|-----------------------|--------------------|----------------------------------------|--------------------|-----------|
| Acetylcholinesterase      | Donepezil       | 5.2                   | Pancreas           | 27.1                                   | 6                  | (1)       |
| Adenosine A1 receptor     | MPDX            | 3.5                   | Liver              | 11                                     | 3                  | (2)       |
| Adenosine A2A receptors   | Preladenant     | 3.7                   | Gallbladder        | 17                                     | 5                  | (3)       |
| Adenosine A2A receptors   | TMSX            | 3.6                   | Liver/ Gallbladder | 11                                     | 3                  | (2)       |
| Amino acid transport      | MeAIB           | 4                     | Pancreas           | 18                                     | 25                 | (4)       |
| Antiglycemic drug         | Metformin       | 9.5                   | Bladder            | 134                                    | 4                  | (5)       |
| Beta amyloid              | BTA1            | 4.3                   | Liver              | 20.1                                   | 5                  | (6)       |
| Beta amyloid              | Pib             | 4.7                   | Gallbladder        | 41.5                                   | 16                 | (7)       |
| Beta amyloid              | Pib             | 5.3                   | Gallbladder        | 44.8                                   | 6                  | (8)       |
| Butyrylcholinesterase     | MP4B            | 4.2                   | Kidney             | 13.7                                   | 7                  | (9)       |
| Cannabinoid CB1 receptors | MePPEP          | 4.6                   | Liver              | 16.2                                   | 7                  | (10)      |
| Cannabinoid CB2 receptors | NE40            | 3.6                   | Small intestine    | 15.6                                   | 6                  | (11)      |
| Central adrenoceptors     | Mirtazapine     | 6.8                   | Lungs              | 34                                     | 1                  | (12)      |
| Cholestatic disease       | Cholylsarcosine | 6.2                   | Gallbladder        | 179.9                                  | 8                  | (13)      |
| COX-1                     | PS13            | 4.6                   | Spleen             | 27.8                                   | 15                 | NIMH data |
| COX-2                     | MC1             | 4.6                   | Liver              | 18                                     | 2                  | NIMH data |
| Dopamine D1 receptors     | NNC112          | 5.7                   | Gallbladder        | 32.4                                   | 7                  | (14)      |
| Dopamine D2 receptors     | Raclopride      | 6.3                   | Gallbladder        | 31.5                                   | 6                  | (15)      |
| Dopamine D2 receptors     | Raclopride      | 6.7                   | Kidneys            | 40.6                                   | 3                  | (16)      |
| Dopamine D2/D3 receptors  | PHNO            | 4.5                   | Liver              | 17.9                                   | 6                  | (17)      |
| Dopamine system           | NPA             | 6.7                   | Gallbladder        | 28.1                                   | 6                  | (18)      |
| Dopamine transporters     | PE2I            | 6.4                   | Bladder            | 18                                     | 3                  | (19)      |

|                                                |                 |                   |                 |      |    |      |
|------------------------------------------------|-----------------|-------------------|-----------------|------|----|------|
| Dopamine transporters                          | CFT             | 8.9               | Bladder         | 63.2 | 6  | (20) |
| Epidermal growth factor receptor               | PD153035        | 4.7               | Bladder         | 60.8 | 9  | (21) |
| Extrastriatal dopamine D <sub>2</sub> receptor | FLB 457         | 5.9               | Kidney          | 17.1 | 6  | (22) |
| Fatty acid amide hydrolase                     | Carbonyl-URB694 | 4.6               | Gallbladder     | 111  | 6  | (23) |
| Fatty acids metabolism                         | Palmitate       | 3.2               | Liver           | 27.5 | 2  | (24) |
| GABA receptors                                 | MPGA            | 4.8               | Small intestine | 33   | 3  | (25) |
| GABA receptors                                 | Flumazenil      | 5.2               | Bladder         | 36.8 | 5  | (26) |
| GABA receptors                                 | Flumazenil      | 7.6               | Bladder         | 63.2 | 6  | (27) |
| Glucose metabolism                             | Glucose         | 4.3 <sup>a</sup>  | Brain           | 11.6 | 33 | (28) |
| Glycine transporter 1                          | RO5013853       | 3.3               | Liver           | 16   | 3  | (29) |
| Glycine transporter 1                          | GSK931145       | 4.5               | Liver           | 11.5 | 8  | (30) |
| H3 receptors                                   | MK-8278         | 5.4               | Pancreas        | 40.2 | 3  | (31) |
| Histamine H3 receptors                         | TASP457         | 6.9               | Pancreas        | 27.4 | 3  | (32) |
| Imidazoline2 binding site                      | BU99008         | 5.6               | Heart           | 28   | 4  | (33) |
| Infection imaging                              | Trimethoprim    | 4.4               | Kidney          | 14.5 | 3  | (34) |
| mGlu1 receptors                                | ITMM            | 4.4               | Bladder         | 12.5 | 12 | (35) |
| mGlu1 receptors                                | ITMM            | 4.6               | Bladder         | 13.2 | 3  | (36) |
| mGlu2 receptors                                | JNJ-42491293    | 4.5               | N/A             | N/A  | 3  | (37) |
| mGlu5 receptors                                | ABP688          | 3.7 <sup>a</sup>  | Liver           | 16.4 | 5  | (38) |
| mGlu5 receptors                                | FPEB            | 3.7               | Gallbladder     | 41.2 | 6  | (39) |
| mGlu5 receptors                                | SP203           | 4.4               | Gallbladder     | 38.1 | 8  | (39) |
| Mu-opiate receptors                            | Carfentanil     | 4.6               | Bladder         | 36.5 | 5  | (40) |
| Neuroinflammation                              | Ketoprofen      | 4.7               | Bladder         | 41   | 6  | (41) |
| Nicotine                                       | Nicotine        | 5.4               | Bladder         | 14.7 | 11 | (42) |
| Nicotinic acetylcholine receptors              | CHIBA-1001      | 6.9               | Small intestine | 24   | 3  | (43) |
| NMDA receptors                                 | GMOM            | 4.5               | Spleen          | 12.7 | 5  | (44) |
| NMDA receptors                                 | CNS5161         | 10.6 <sup>a</sup> | Lungs           | 39.3 | 5  | (45) |

|                        |                  |                  |                                    |            |    |      |
|------------------------|------------------|------------------|------------------------------------|------------|----|------|
| NOP1 receptors         | NOP1             | 4.3              | Gallbladder                        | 21         | 9  | (46) |
| OATP1B3                | Telmisartan      | 4.2              | Gallbladder                        | 41.6       | 6  | (47) |
| P2X7 receptor          | JNJ54173717      | 4.5              | Gallbladder                        | 25         | 3  | (48) |
| P-glycoprotein         | dLop             | 7.8              | Kidney                             | 50.1       | 8  | (49) |
| P-glycoprotein         | Elacridar        | 3.4              | Liver                              | 27.6       | 3  | (50) |
| P-glycoprotein         | Tariquidar       | 3.6              | Liver                              | 31.9       | 3  | (50) |
| P-glycoprotein         | Laniquidar       | 4.4              | Liver                              | 25         | 6  | (51) |
| Phosphodiesterase 4    | Rolipram         | 4.8              | Gallbladder                        | 23.1       | 8  | (52) |
| Serotonin 1A receptors | WAY-100635       | 14.1             | Bladder                            | 194        | 6  | (53) |
| Serotonin 1A receptors | CUMI-101         | 5.3              | Pancreas                           | 32         | 9  | (54) |
| Serotonin 2A receptors | Cimbi-36         | 5.5              | Spleen                             | 18.4       | 5  | (55) |
| Serotonin 2A receptors | Cimbi-36_5       | 5.3              | Spleen                             | 17.9       | 2  | (55) |
| Serotonin 6 receptors  | GSK215083        | 7.7              | Lungs                              | 25.6       | 6  | (56) |
| Serotonin transporters | Dasb             | 7                | Lungs                              | 32.8       | 7  | (57) |
| Sigma receptors        | SA4503           | 6.7              | Spleen/ Thyroid                    | 24         | 3  | (2)  |
| Synaptic density       | UCB-J            | 7.6              | Bladder (males)<br>Liver (females) | 22.4; 24.8 | 4  | (58) |
| TSPO protein           | PBR28            | 6.6              | Kidney                             | 52.6       | 7  | (59) |
| TSPO protein           | PK11195          | 5.1              | Kidney                             | 14         | 5  | (60) |
| TSPO protein           | PK11195          | 4.6 <sup>a</sup> | Bladder                            | 12         | 7  | (61) |
| TSPO protein           | CB184            | 5.9              | Kidney                             | 21         | 5  | (62) |
| TSPO protein           | DPA-713          | 5.9              | Lungs                              | 20.1       | 6  | (63) |
| TSPO protein           | DAA1106          | 4.1              | Spleen                             | 18.2       | 12 | (64) |
| TSPO protein           | ER176            | 4.1              | Kidney                             | 14.3       | 9  | (65) |
| Tumor imaging          | Methyl-thymidine | 3.8              | Liver                              | 37         | 6  | (66) |
| Tumor imaging          | Choline          | 4.4              | Kidney                             | 21         | 6  | (67) |
| Tumor imaging          | Docetaxel        | 4.7              | Liver                              | 35.2       | 5  | (68) |
| Tumor imaging          | Acetate          | 4.9              | Pancreas                           | 17         | 6  | (69) |
| Tumor imaging          | Acetate          | 3.5              | Kidney                             | 52         | 14 | (70) |
| Tumor imaging          | Methionine       | 5.1              | Bladder                            | 27         | 5  | (71) |
| Tumor imaging          | Erlotinib        | 3.6              | Liver                              | 29.4       | 1  | (72) |

|               |                   |     |         |      |   |      |
|---------------|-------------------|-----|---------|------|---|------|
| Tumor imaging | Methyl-L-Cysteine | 4.0 | Liver   | 10.1 | 6 | (73) |
| Tumor imaging | 4DST              | 4.2 | Bladder | 17.6 | 3 | (74) |

When separate doses for men and women or for different ethnicities are reported, the average value was used. Doses to children were not considered.

<sup>a</sup> Effective dose equivalent (EDE). Tracers for which the dosimetry is expressed as EDE are not included in the mean  $\pm$  SD of the tracer doses, nor in Figure 1

## References

1. Gjerloff T, Jakobsen S, Nahimi A, et al. In vivo imaging of human acetylcholinesterase density in peripheral organs using <sup>11</sup>C-donepezil: dosimetry, biodistribution, and kinetic analyses. *J Nucl Med*. 2014;55:1818-1824.
2. Sakata M, Oda K, Toyohara J, Ishii K, Nariai T, Ishiwata K. Direct comparison of radiation dosimetry of six PET tracers using human whole-body imaging and murine biodistribution studies. *Ann Nucl Med*. 2013;27:285-296.
3. Sakata M, Ishibashi K, Imai M, et al. Initial Evaluation of an Adenosine A2A Receptor Ligand, (<sup>11</sup>C)-Preladenant, in Healthy Human Subjects. *J Nucl Med*. 2017;58:1464-1470.
4. Tolvanen T, Nagren K, Yu M, et al. Human radiation dosimetry of [<sup>11</sup>C]MeAIB, a new tracer for imaging of system A amino acid transport. *Eur J Nucl Med Mol Imaging*. 2006;33:1178-1184.
5. Gormsen LC, Sundelin EI, Jensen JB, et al. In Vivo Imaging of Human <sup>11</sup>C-Metformin in Peripheral Organs: Dosimetry, Biodistribution, and Kinetic Analyses. *J Nucl Med*. 2016;57:1920-1926.
6. Thees S, Neumaier B, Glatting G, et al. Radiation dosimetry and biodistribution of the beta-amyloid plaque imaging tracer <sup>11</sup>C-BTA-1 in humans. *Nuklearmedizin*. 2007;46:175-180.
7. Scheinin NM, Tolvanen TK, Wilson IA, Arponen EM, Nagren KA, Rinne JO. Biodistribution and radiation dosimetry of the amyloid imaging agent <sup>11</sup>C-PIB in humans. *J Nucl Med*. 2007;48:128-133.
8. O'Keefe GJ, Saunderson TH, Ng S, et al. Radiation dosimetry of beta-amyloid tracers <sup>11</sup>C-PiB and <sup>18</sup>F-BAY94-9172. *J Nucl Med*. 2009;50:309-315.
9. Virta JR, Tolvanen T, Nagren K, Bruck A, Roivainen A, Rinne JO. 1-<sup>11</sup>C-methyl-4-piperidinyl-N-butyrates radiation dosimetry in humans by dynamic organ-specific evaluation. *J Nucl Med*. 2008;49:347-353.
10. Terry GE, Hirvonen J, Liow JS, et al. Biodistribution and dosimetry in humans of two inverse agonists to image cannabinoid CB1 receptors using positron emission tomography. *Eur J Nucl Med Mol Imaging*. 2010;37:1499-1506.
11. Ahmad R, Koole M, Evens N, et al. Whole-body biodistribution and radiation dosimetry of the cannabinoid type 2 receptor ligand [<sup>11</sup>C]-NE40 in healthy subjects. *Mol Imaging Biol*. 2013;15:384-390.

12. Marthi K, Hansen SB, Jakobsen S, Bender D, Smith SB, Smith DF. Biodistribution and radiation dosimetry of [N-methyl-<sup>11</sup>C]mirtazapine, an antidepressant affecting adrenoceptors. *Appl Radiat Isot.* 2003;59:175-179.
13. Frisch K, Kjaergaard K, Horsager J, Schacht AC, Munk OL. Human biodistribution, dosimetry, radiosynthesis and quality control of the bile acid PET tracer [N-methyl-(<sup>11</sup>C)]cholylsarcosine. *Nucl Med Biol.* 2019;72-73:55-61.
14. Cropley VL, Fujita M, Musachio JL, et al. Whole-body biodistribution and estimation of radiation-absorbed doses of the dopamine D1 receptor radioligand <sup>11</sup>C-NNC 112 in humans. *J Nucl Med.* 2006;47:100-104.
15. Slifstein M, Hwang DR, Martinez D, et al. Biodistribution and radiation dosimetry of the dopamine D2 ligand <sup>11</sup>C-raclopride determined from human whole-body PET. *J Nucl Med.* 2006;47:313-319.
16. Ribeiro MJ, Ricard M, Bourgeois S, et al. Biodistribution and radiation dosimetry of [<sup>11</sup>C]raclopride in healthy volunteers. *Eur J Nucl Med Mol Imaging.* 2005;32:952-958.
17. Mizrahi R, Rusjan P, Vitcu I, et al. Whole-body distribution and radiation dosimetry of <sup>11</sup>C-(+)-PHNO, a D2/3 agonist ligand. *J Nucl Med.* 2012;53:1802-1806.
18. Laymon CM, Mason NS, Frankle WG, et al. Human biodistribution and dosimetry of the D2/3 agonist <sup>11</sup>C-N-propylnorapomorphine (<sup>11</sup>C-NPA) determined from PET. *J Nucl Med.* 2009;50:814-817.
19. Ribeiro MJ, Ricard M, Lievre MA, et al. Whole-body distribution and radiation dosimetry of the dopamine transporter radioligand [<sup>11</sup>C]PE2I in healthy volunteers. *Nucl Med Biol.* 2007;34:465-470.
20. Huang T, Wang H, Tang G, et al. Human radiation dose estimation of (<sup>11</sup>C)-CFT using whole-body PET. *Clin Nucl Med.* 2012;37:1159-1162.
21. Liu N, Li M, Li X, et al. PET-based biodistribution and radiation dosimetry of epidermal growth factor receptor-selective tracer <sup>11</sup>C-PD153035 in humans. *J Nucl Med.* 2009;50:303-308.
22. Kimura Y, Ito H, Shiraishi T, et al. Biodistribution and radiation dosimetry in humans of [(<sup>11</sup>C)]FLB 457, a positron emission tomography ligand for the extrastriatal dopamine D(2) receptor. *Nucl Med Biol.* 2014;41:102-105.
23. Boileau I, Bloomfield PM, Rusjan P, et al. Whole-body radiation dosimetry of <sup>11</sup>C-carbonyl-URB694: a PET tracer for fatty acid amide hydrolase. *J Nucl Med.* 2014;55:1993-1997.

24. Christensen NL, Jakobsen S, Schacht AC, et al. Whole-Body Biodistribution, Dosimetry, and Metabolite Correction of [(11)C]Palmitate: A PET Tracer for Imaging of Fatty Acid Metabolism. *Mol Imaging*. 2017;16:1536012117734485.
25. Santens P, De Vos F, Thierens H, et al. Biodistribution and dosimetry of carbon-11-methoxyprogabidic acid, a possible ligand for GABA-receptors in the brain. *J Nucl Med*. 1998;39:307-310.
26. Nugent AC, Neumeister A, Drevets WC, Eckelman WC, Channing MA, Herscovitch P. Human biodistribution and dosimetry of the PET benzodiazepine receptor ligand 11C-flumazenil. *Journal of Nuclear Medicine*. 2004;45(suppl):434P.
27. Laymon CM, Narendran R, Mason NS, et al. Human biodistribution and dosimetry of the PET radioligand [(1)(1)C]flumazenil (FMZ). *Mol Imaging Biol*. 2012;14:115-122.
28. Graham MM, Peterson LM, Muzi M, et al. 1-[Carbon-11]-glucose radiation dosimetry and distribution in human imaging studies. *J Nucl Med*. 1998;39:1805-1810.
29. Wong DF, Ostrowitzki S, Zhou Y, et al. Characterization of [11C]RO5013853, a novel PET tracer for the glycine transporter type 1 (GlyT1) in humans. *Neuroimage*. 2013;75:282-290.
30. Bullich S, Slifstein M, Passchier J, et al. Biodistribution and radiation dosimetry of the glycine transporter-1 ligand 11C-GSK931145 determined from primate and human whole-body PET. *Mol Imaging Biol*. 2011;13:776-784.
31. Van Laere KJ, Sanabria-Bohorquez SM, Mozley DP, et al. (11)C-MK-8278 PET as a tool for pharmacodynamic brain occupancy of histamine 3 receptor inverse agonists. *J Nucl Med*. 2014;55:65-72.
32. Kimura Y, Seki C, Ikoma Y, et al. [(11)C]TASP457, a novel PET ligand for histamine H3 receptors in human brain. *Eur J Nucl Med Mol Imaging*. 2016;43:1653-1663.
33. Venkataraman AV, Keat N, Myers JF, et al. First evaluation of PET-based human biodistribution and radiation dosimetry of (11)C-BU99008, a tracer for imaging the imidazoline2 binding site. *EJNMMI Res*. 2018;8:71.
34. Doot R, Young A, Schubert E, et al. First-in-human biodistribution and dosimetry of [11C]trimethoprim. *Journal of Nuclear Medicine*. 2019;60:1642.
35. Ito K, Sakata M, Oda K, et al. Comparison of dosimetry between PET/CT and PET alone using (11)C-ITMM. *Australas Phys Eng Sci Med*. 2016;39:177-186.

- 36.** Toyohara J, Sakata M, Oda K, et al. Initial human PET studies of metabotropic glutamate receptor type 1 ligand 11C-ITMM. *J Nucl Med.* 2013;54:1302-1307.
- 37.** Leurquin-Sterk G, Celen S, Van Laere K, et al. What We Observe In Vivo Is Not Always What We See In Vitro: Development and Validation of 11C-JNJ-42491293, A Novel Radioligand for mGluR2. *J Nucl Med.* 2017;58:110-116.
- 38.** Treyer V, Streffer J, Ametamey SM, et al. Radiation dosimetry and biodistribution of 11C-ABP688 measured in healthy volunteers. *Eur J Nucl Med Mol Imaging.* 2008;35:766-770.
- 39.** Lohith TG, Tsujikawa T, Simeon FG, et al. Comparison of two PET radioligands, [(11)C]FPEB and [(11)C]SP203, for quantification of metabotropic glutamate receptor 5 in human brain. *J Cereb Blood Flow Metab.* 2017;37:2458-2470.
- 40.** Newberg AB, Ray R, Scheuermann J, et al. Dosimetry of 11C-carfentanil, a micro-opioid receptor imaging agent. *Nucl Med Commun.* 2009;30:314-318.
- 41.** Ohnishi A, Senda M, Yamane T, et al. Human whole-body biodistribution and dosimetry of a new PET tracer, [(11)C]ketoprofen methyl ester, for imagings of neuroinflammation. *Nucl Med Biol.* 2014;41:594-599.
- 42.** Garg PK, Lokitz SJ, Nazih R, Garg S. Biodistribution and Radiation Dosimetry of (11)C-Nicotine from Whole-Body PET Imaging in Humans. *J Nucl Med.* 2017;58:473-478.
- 43.** Sakata M, Wu J, Toyohara J, et al. Biodistribution and radiation dosimetry of the alpha7 nicotinic acetylcholine receptor ligand [11C]CHIBA-1001 in humans. *Nucl Med Biol.* 2011;38:443-448.
- 44.** van der Aart J, van der Doef TF, Horstman P, et al. Human Dosimetry of the N-Methyl-d-Aspartate Receptor Ligand (11)C-GMOM. *J Nucl Med.* 2017;58:1330-1333.
- 45.** Dhawan V, Robeson W, Bjelke D, et al. Human Radiation Dosimetry for the N-Methyl-D-Aspartate Receptor Radioligand 11C-CNS5161. *J Nucl Med.* 2015;56:869-872.
- 46.** Lohith TG, Zoghbi SS, Morse CL, et al. Brain and whole-body imaging of nociceptin/orphanin FQ peptide receptor in humans using the PET ligand 11C-NOP-1A. *J Nucl Med.* 2012;53:385-392.
- 47.** Shimizu K, Takashima T, Yamane T, et al. Whole-body distribution and radiation dosimetry of [11C]telmisartan as a biomarker for hepatic organic anion transporting polypeptide (OATP) 1B3. *Nucl Med Biol.* 2012;39:847-853.



48. Van Weehaeghe D, Koole M, Schmidt ME, et al. [(11)C]JNJ54173717, a novel P2X7 receptor radioligand as marker for neuroinflammation: human biodistribution, dosimetry, brain kinetic modelling and quantification of brain P2X7 receptors in patients with Parkinson's disease and healthy volunteers. *Eur J Nucl Med Mol Imaging*. 2019;46:2051-2064.
49. Seneca N, Zoghbi SS, Liow JS, et al. Human brain imaging and radiation dosimetry of 11C-N-desmethyl-loperamide, a PET radiotracer to measure the function of P-glycoprotein. *J Nucl Med*. 2009;50:807-813.
50. Bauer M, Blaickner M, Philippe C, et al. Whole-Body Distribution and Radiation Dosimetry of 11C-Elacridar and 11C-Tarividar in Humans. *J Nucl Med*. 2016;57:1265-1268.
51. Postnov A, Froklage FE, van Lingen A, et al. Radiation dose of the P-glycoprotein tracer 11C-laniquidar. *J Nucl Med*. 2013;54:2101-2103.
52. Sprague DR, Fujita M, Ryu YH, Liow JS, Pike VW, Innis RB. Whole-body biodistribution and radiation dosimetry in monkeys and humans of the phosphodiesterase 4 radioligand [(11)C](R)-rolipram: comparison of two-dimensional planar, bisected and quadrisectioned image analyses. *Nucl Med Biol*. 2008;35:493-500.
53. Parsey RV, Belanger MJ, Sullivan GM, et al. Biodistribution and radiation dosimetry of 11C-WAY100,635 in humans. *J Nucl Med*. 2005;46:614-619.
54. Hines CS, Liow J-S, Zanotti-Fregonara P, et al. Human biodistribution and dosimetry of 11C-CUMI-101, an agonist radioligand for serotonin-1A receptors in brain. *PloS one*. 2011;6:e25309.
55. Johansen A, Holm S, Dall B, et al. Human biodistribution and radiation dosimetry of the 5-HT2A receptor agonist Cimbi-36 labeled with carbon-11 in two positions. *EJNMMI Res*. 2019;9:71.
56. Comley RA, Salinas C, Mizrahi R, et al. Biodistribution and radiation dosimetry of the serotonin 5-HT(6) ligand [(1)(1)C]GSK215083 determined from human whole-body PET. *Mol Imaging Biol*. 2012;14:517-521.
57. Lu JQ, Ichise M, Liow JS, Ghose S, Vines D, Innis RB. Biodistribution and radiation dosimetry of the serotonin transporter ligand 11C-DASB determined from human whole-body PET. *J Nucl Med*. 2004;45:1555-1559.
58. Bini J, Holden D, Fontaine K, et al. Human adult and adolescent biodistribution and dosimetry of the synaptic vesicle glycoprotein 2A radioligand 11C-UCB-J. *EJNMMI Research*. 2020;10:83.

59. Brown AK, Fujita M, Fujimura Y, et al. Radiation dosimetry and biodistribution in monkey and man of <sup>11</sup>C-PBR28: a PET radioligand to image inflammation. *J Nucl Med.* 2007;48:2072-2079.
60. Hirvonen J, Roivainen A, Virta J, Helin S, Nagren K, Rinne JO. Human biodistribution and radiation dosimetry of <sup>11</sup>C-(R)-PK11195, the prototypic PET ligand to image inflammation. *Eur J Nucl Med Mol Imaging.* 2010;37:606-612.
61. Kumar A, Muzik O, Chugani D, Chakraborty P, Chugani HT. PET-derived biodistribution and dosimetry of the benzodiazepine receptor-binding radioligand (<sup>11</sup>C)-(R)-PK11195 in children and adults. *J Nucl Med.* 2010;51:139-144.
62. Sakata M, Ishibashi K, Imai M, et al. Assessment of safety, efficacy, and dosimetry of a novel 18-kDa translocator protein ligand, [(<sup>11</sup>C)CB184, in healthy human volunteers. *EJNMMI Res.* 2017;7:26.
63. Endres CJ, Coughlin JM, Gage KL, Watkins CC, Kassiou M, Pomper MG. Radiation dosimetry and biodistribution of the TSPO ligand <sup>11</sup>C-DPA-713 in humans. *J Nucl Med.* 2012;53:330-335.
64. Brody AL, Okita K, Shieh J, et al. Radiation dosimetry and biodistribution of the translocator protein radiotracer [(<sup>11</sup>C)DAA1106 determined with PET/CT in healthy human volunteers. *Nucl Med Biol.* 2014;41:871-875.
65. Ikawa M, Lohith TG, Shrestha S, et al. <sup>11</sup>C-ER176, a Radioligand for 18-kDa Translocator Protein, Has Adequate Sensitivity to Robustly Image All Three Affinity Genotypes in Human Brain. *J Nucl Med.* 2017;58:320-325.
66. Thierens H, van Eijkeren M, Goethals P. Biokinetics and dosimetry for [methyl-<sup>11</sup>C]thymidine. *Br J Radiol.* 1994;67:292-295.
67. Tolvanen T, Yli-Kerttula T, Ujula T, et al. Biodistribution and radiation dosimetry of [(<sup>11</sup>C)choline: a comparison between rat and human data. *Eur J Nucl Med Mol Imaging.* 2010;37:874-883.
68. van der Veldt AA, Hendrikse NH, Smit EF, et al. Biodistribution and radiation dosimetry of <sup>11</sup>C-labelled docetaxel in cancer patients. *Eur J Nucl Med Mol Imaging.* 2010;37:1950-1958.
69. Seltzer MA, Jahan SA, Sparks R, et al. Radiation dose estimates in humans for (<sup>11</sup>C)-acetate whole-body PET. *J Nucl Med.* 2004;45:1233-1236.

- 70.** Liu D, Khong PL, Gao Y, et al. Radiation Dosimetry of Whole-Body Dual-Tracer <sup>18</sup>F-FDG and <sup>11</sup>C-Acetate PET/CT for Hepatocellular Carcinoma. *J Nucl Med.* 2016;57:907-912.
- 71.** Deloar HM, Fujiwara T, Nakamura T, et al. Estimation of internal absorbed dose of L-[methyl-<sup>11</sup>C]methionine using whole-body positron emission tomography. *Eur J Nucl Med.* 1998;25:629-633.
- 72.** Petrulli JR, Hansen SB, Abourbeh G, et al. A multi species evaluation of the radiation dosimetry of [(<sup>11</sup>C)erlotinib, the radiolabeled analog of a clinically utilized tyrosine kinase inhibitor. *Nucl Med Biol.* 2017;47:56-61.
- 73.** Yao B, Tang C, Tang G, et al. Human Biodistribution and Radiation Dosimetry of S-<sup>11</sup>C-Methyl-L-Cysteine Using Whole-Body PET. *Clin Nucl Med.* 2015;40:e470-474.
- 74.** Toyohara J, Nariai T, Sakata M, et al. Whole-body distribution and brain tumor imaging with (<sup>11</sup>C)-4DST: a pilot study. *J Nucl Med.* 2011;52:1322-1328.

Supplemental Table 2: Human doses from <sup>18</sup>F-labeled tracers.

| Target                           | Tracer                      | ED<br>( $\mu$ SV/MBq) | Critical organ | Critical organ dose<br>( $\mu$ SV/MBq) | Number of subjects | Reference |
|----------------------------------|-----------------------------|-----------------------|----------------|----------------------------------------|--------------------|-----------|
| Adenosine 2A receptor            | MNI-444                     | 23                    | ULI            | 99                                     | 4                  | (1)       |
| Adenosine A1 receptor            | CPFPX                       | 17.6                  | Gallbladder    | 136.2                                  | 6                  | (2)       |
| Amino acid transporter 1         | NKO-035                     | 20                    | Bladder        | 302                                    | 4                  | (3)       |
| Amino acid transporter 1         | BF3-Tyr                     | 3.7                   | N/A            | N/A                                    | 2                  | (4)       |
| Apoptosis                        | F-ML-10                     | 15.4                  | Bladder        | 172                                    | 8                  | (5)       |
| Apoptosis                        | CP-18                       | 38                    | Bladder        | 536                                    | 7                  | (6)       |
| Beta amyloid                     | FPYBF-2                     | 8.5                   | Liver          | 32.6                                   | 4                  | (7)       |
| Beta amyloid                     | FC119S                      | 3.9                   | N/A            | N/A                                    | 3                  | (8)       |
| Beta-amyloid                     | FACT                        | 18.6                  | Gallbladder    | 333                                    | 6                  | (9)       |
| Beta-amyloid                     | Flutemetamol (GE067)        | 33.8                  | Gallbladder    | 287                                    | 6                  | (10)      |
| Beta-amyloid                     | Flutemetamol (GE067)        | 26                    | Bladder        | 114                                    | 6                  | (11)      |
| Beta-amyloid                     | Florbetaben<br>(BAY94-9172) | 14.7                  | Gallbladder    | 132.4                                  | 3                  | (12)      |
| Beta-amyloid                     | Florbetaben<br>(BAY94-9172) | 16.5                  | Gallbladder    | 103                                    | 12                 | (13)      |
| Beta-amyloid                     | Florbetapir (AV-45)         | 16                    | Gallbladder    | 150                                    | 9                  | (14)      |
| Beta-amyloid                     | Florbetapir (AV-45)         | 13                    | N/A            | N/A                                    | 3                  | (15)      |
| Beta-amyloid                     | Florbetapir (AV-45)         | 19.3                  | Gallbladder    | 184.7                                  | 3                  | (16)      |
| Beta-amyloid                     | Florbetapir (AV-45)         | 18.6                  | Gallbladder    | 143                                    | 9                  | (17)      |
| Beta-amyloid                     | Florbetapir (AV-45)         | 17.8                  | Gallbladder    | 28.9                                   | 6                  | (18)      |
| Beta-secretase 1                 | PF-06684511                 | 24.7                  | Pancreas       | 92.9                                   | 5                  | (19)      |
| Bone imaging                     | FNA                         | 17                    | Bladder        | 80                                     | 8                  | (20)      |
| Boron neutron capture<br>therapy | FBPA                        | 23.9                  | Kidney         | 32                                     | 3                  | (21)      |
| Boron neutron capture            | FBPA                        | 15                    | Heart          | 14                                     | 6                  | (22)      |

|                                    |                          |                  |             |      |    |      |
|------------------------------------|--------------------------|------------------|-------------|------|----|------|
| therapy                            |                          |                  |             |      |    |      |
| Cannabinoid CB1 receptors          | FMPEP-d2                 | 19.7             | Bladder     | 66.2 | 7  | (23) |
| Cannabinoid CB1 receptors          | MK-9470                  | 22.8             | Gallbladder | 159  | 8  | (24) |
| Cardiac sympathetic innervation    | 4F-MHPG                  | 21.1             | Bladder     | 175  | 4  | (25) |
| Cardiac sympathetic innervation    | 3F-PHPG                  | 20.3             | Bladder     | 165  | 4  | (25) |
| Caspase 3                          | ICMT-11                  | 25               | Gallbladder | 594  | 8  | (26) |
| c-Met receptor                     | AH113804                 | 29.8             | Bladder     | 351  | 6  | (27) |
| Deoxycytidine kinase               | Clofarabine              | 20               | Bladder     | 234  | 5  | (28) |
| Deoxycytidine kinase               | L-18F-FMAC               | 9.1              | Bladder     | 54.3 | 3  | (29) |
| Deoxycytidine kinase               | L-18F-FAC                | 7.6              | Bladder     | 49.6 | 3  | (29) |
| Deoxycytidine kinase               | FAC                      | 5.2              | Bladder     | 20.4 | 3  | (29) |
| Deoxycytidine kinase               | FAC                      | 13.7             | Bladder     | 55.7 | 3  | (30) |
| Dopamine D2/D3 receptors           | Fallypride               | 21.1             | Gallbladder | 120  | 5  | (31) |
| Dopamine D3 receptors              | Fluortriopride           | 22.5             | Gallbladder | 436  | 10 | (32) |
| Dopamine transporters              | FE-PE2I                  | 23               | Bladder     | 119  | 5  | (33) |
| Dopamine transporters              | FP-CIT                   | 8.6 <sup>a</sup> | Bladder     | 58.6 | 12 | (34) |
| Dopaminergic system                | FDOPA                    | 19.9             | Bladder     | 150  | 18 | (35) |
| Estrogen receptors                 | 16 $\alpha$ -F-estradiol | 27               | Gallbladder | 797  | 10 | (36) |
| Estrogen receptors                 | 16 $\alpha$ -F-estradiol | 22 <sup>b</sup>  | Liver       | 126  | 49 | (37) |
| Fatty acids metabolism             | fluoropivalate           | 15.4             | Liver       | 70.6 | 24 | (38) |
| Fatty acids metabolism             | FluorBetaOx              | 14               | Bladder     | 110  | 8  | (39) |
| Folate receptor alpha              | AzaFol                   | 18               | Liver       | 51.9 | 6  | (40) |
| Gastrin-Releasing Peptide receptor | BAY 864367               | 23               | Gallbladder | 240  | 5  | (41) |
| Gastrin-Releasing Peptide receptor | BAY 864367               | 14.3             | Bladder     | 49.9 | 10 | (42) |
| Gene expression                    | FHBG                     | 15.9             | Bladder     | 94.2 | 10 | (43) |

|                                 |                          |                 |                       |       |                 |      |
|---------------------------------|--------------------------|-----------------|-----------------------|-------|-----------------|------|
| Glucose metabolism              | FDG                      | 29              | Bladder               | 310   | 6               | (44) |
| Glucose metabolism              | FDG                      | 24 <sup>c</sup> | Bladder               | 73    | 24 <sup>d</sup> | (45) |
| Glucose metabolism              | FDG                      | 15              | Bladder               | 52    | 30              | (46) |
| Glucose metabolism              | FDG                      | 15.3            | Bladder               | 84.6  | 8               | (47) |
| Glucose metabolism              | FDG                      | 19.9            | Bladder               | 154   | 183             | (48) |
| Glycine transporter 1           | CFpyPB (MK-6577)         | 24.5            | Gallbladder           | 267   | 3               | (49) |
| Glycoprotein IIb/IIIa receptors | GP1                      | 21.2            | Bladder               | 88.4  | 30              | (50) |
| Histone deacetylase 6           | EKZ-001                  | 39.1            | Upper large intestine | 270   | 4               | (51) |
| Hypoxia                         | FMISO                    | 14 <sup>b</sup> | Bladder               | 29    | 60              | (52) |
| Hypoxia                         | FETNIM                   | 19              | Bladder               | 127   | 27              | (53) |
| Hypoxia                         | EF5                      | 18              | Bladder               | 120   | 16              | (54) |
| Hypoxia                         | EF5                      | 23              | Bladder               | 170   | 10              | (55) |
| Hypoxia                         | DiFA                     | 14.4            | Bladder               | 94.7  | 8               | (56) |
| Hypoxia                         | FAZA                     | 13.5            | Bladder               | 47    | 5               | (57) |
| Hypoxia                         | HX4                      | 27              | Bladder               | 299   | 4               | (58) |
| Infection imaging               | Fluorodeoxyorbitol       | 21              | Bladder               | 248   | 6               | (59) |
| Integrins                       | Galacto-RGD              | 18              | Bladder               | 200   | 5               | (60) |
| Integrins                       | RGD-K5                   | 31              | Bladder               | 376   | 4               | (61) |
| Integrins                       | FPPRGD2                  | 39.6            | Bladder               | 233.3 | 5               | (62) |
| Melanoma imaging                | P3BZA                    | 19.3            | Bladder               | 120   | 6               | (63) |
| mGlu1 receptors                 | FIMX                     | 23.4            | Bladder               | 251   | 4               | (64) |
| mGlu5 receptors                 | SP203                    | 17.8            | Bladder               | 76    | 7               | (65) |
| mGlu5 receptors                 | PSS232                   | 15.3            | Gallbladder           | 23    | 6               | (66) |
| mGlu5 receptors                 | FPEB                     | 25              | Bladder               | 258   | 9               | (67) |
| mGlu5 receptors                 | FPEB                     | 16.9            | Gallbladder           | 191   | 6               | (68) |
| Mitochondria                    | FBnTP                    | 27              | Liver                 | 128   | 3               | (69) |
| Muscarinic receptors            | F-DEX                    | 19.7            | Liver                 | 52.9  | 5               | (70) |
| Myocardial perfusion            | Flurpiridaz (BMS-747158) | 19              | Kidney                | 66    | 13              | (71) |
| Myocardial perfusion            | BFPET                    | 18              | Kidney                | N/A   | 6               | (72) |

|                                   |              |                   |             |       |    |      |
|-----------------------------------|--------------|-------------------|-------------|-------|----|------|
| Neuroendocrine tumors             | MFBG         | 23                | Bladder     | 186   | 10 | (73) |
| Nicotinic acetylcholine receptor  | nifene       | 24.9              | Bladder     | 179.7 | 4  | (74) |
| Nicotinic acetylcholine receptors | A-85380      | 19.4              | Bladder     | 81.8  | 3  | (75) |
| Nicotinic acetylcholine receptors | A-85380      | 39                | Bladder     | 180   | 6  | (76) |
| Nicotinic acetylcholine receptors | A-85380      | 23.7              | Bladder     | 153   | 2  | (77) |
| Nicotinic acetylcholine receptors | flubatine    | 23.4              | Bladder     | 80.2  | 3  | (78) |
| Nicotinic acetylcholine receptors | AZAN         | 14                | Bladder     | 23    | 2  | (79) |
| Nicotinic acetylcholine receptors | NCFHEB       | 22.9              | Bladder     | 80.2  | 3  | (80) |
| Nitric oxide synthase             | NOS          | 15.9              | Bladder     | 95.3  | 16 | (81) |
| Norepinephrine transporter        | LMI1195      | 26                | Bladder     | 101.5 | 12 | (82) |
| Norepinephrine transporter        | FMeNER-D2    | 17                | Bladder     | 38    | 4  | (83) |
| O-GlcNAcase                       | LSN3316612   | 20.5              | Bladder     | 86.4  | 6  | (84) |
| P2X7 receptor                     | JNJ-64413739 | 22                | Gallbladder | 256   | 3  | (85) |
| Phosphodiesterase 10A             | JNJ-42259152 | 24.9              | Gallbladder | 239   | 6  | (86) |
| Phosphodiesterase 10A             | MNI-659      | 24.1              | Gallbladder | 505   | 4  | (87) |
| Phosphodiesterase 2A              | PF-05270430  | 34.9              | Gallbladder | N/A   | 4  | (88) |
| Prostate cancer                   | F-choline    | 18 <sup>e</sup>   | Kidney      | 79    | 10 | (89) |
| Prostate cancer                   | F-choline    | 34.1 <sup>b</sup> | Kidney      | 170   | 12 | (90) |
| Prostate cancer                   | FDHT         | 12.5 <sup>a</sup> | Bladder     | 86.8  | 7  | (91) |
| Prostate cancer                   | FDHT         | 20                | Bladder     | 61    | 11 | (92) |
| Prostate cancer                   | DCFBC        | 19.9              | Bladder     | 32.4  | 5  | (93) |
| Prostate cancer                   | JK-PSMA-7    | 10.9              | Kidney      | 17.6  | 10 | (94) |
| Prostate cancer                   | PSMA-11      | 12.8              | Bladder     | 126   | 6  | (95) |

|                            |                               |                   |                                        |          |    |       |
|----------------------------|-------------------------------|-------------------|----------------------------------------|----------|----|-------|
| Prostate cancer            | CTT1057                       | 23                | Bladder                                | 259      | 5  | (96)  |
| Prostate cancer            | DCFPyL                        | 17                | Lacrimal glands                        | 242      | 9  | (97)  |
| Prostate cancer            | DCFPyL                        | 13.9              | Kidney                                 | 94.5     | 9  | (98)  |
| Prostate cancer            | PSMA-1007                     | 22                | Kidney                                 | 170      | 3  | (99)  |
| Prostate cancer            | FSU-880                       | 9.2               | Kidney                                 | 54.4     | 6  | (100) |
| Prostate cancer            | Florastamin                   | 4.9               | Kidney                                 | 62       | 15 | (101) |
| Pyruvate kinase M2         | DASA-23                       | 23.5              | Gallbladder                            | 607.8    | 5  | (102) |
| Serotonin 5-HT1A receptors | Mefway                        | 40.2              | Bladder                                | 471      | 6  | (103) |
| Sigma 1 receptors          | Fluspidine                    | 21                | Liver                                  | 76       | 4  | (104) |
| Sigma-1 receptors          | FTC-146                       | 25.9              | Bladder                                | 149.8    | 10 | (105) |
| Sodium iodide symporter    | tetrafluoroborate             | 50                | Thyroid                                | 31       | 8  | (106) |
| Sodium iodide symporter    | tetrafluoroborate             | 32.6              | Thyroid                                | 135      | 5  | (107) |
| Somatostatin receptors     | AIF-OC                        | 22.4              | Spleen                                 | 159      | 6  | (108) |
| Somatostatin receptors     | AIF-OC                        | 23.1              | Spleen                                 | 142      | 3  | (109) |
| Tachykinin NK(1) receptors | SPA-RQ                        | 32.3              | Kidney                                 | 92       | 7  | (110) |
| Tau protein                | PI-2620                       | 33.2              | Right colon                            | 242      | 6  | (111) |
| Tau protein                | AV1451 (T807)                 | 22.5              | Liver                                  | 81.2     | 6  | (112) |
| Tau protein                | GTP1                          | 30.7              | Gallbladder                            | 14.1     | 6  | (113) |
| Tau protein                | MK-6240                       | 29.4              | Gallbladder                            | 202      | 3  | (114) |
| Tau protein                | RO-948                        | 15                | Gallbladder                            | 150      | 6  | (115) |
| Tau protein                | THK-5351                      | 22.7              | Gallbladder                            | 242      | 12 | (116) |
| Tau protein                | JNJ-64326067                  | 25.5              | Right colon (males), bladder (females) | 152, 182 | 6  | (117) |
| TSPO                       | PBR06                         | 18.5              | Gallbladder                            | 367      | 7  | (118) |
| TSPO                       | FEPPA                         | 20.2              | Lungs                                  | 56.5     | 6  | (119) |
| TSPO                       | DPA-714                       | 21                | Small intestine                        | 47       | 6  | (120) |
| Tumor imaging              | 5-fluorouracil                | 12.1              | Gallbladder                            | 79.9     | 15 | (121) |
| Tumor imaging              | FLT                           | 15.5 <sup>a</sup> | Bladder                                | 176.5    | 18 | (122) |
| Tumor imaging              | FACBC (GE-148) (fluciclovine) | 14.1              | Liver                                  | 52.2     | 6  | (123) |
| Tumor imaging              | FACBC (GE-148)                | 22.1              | Pancreas                               | 102.2    | 6  | (124) |



| (fluciclovine)                      |                           |      |                       |       |    |       |
|-------------------------------------|---------------------------|------|-----------------------|-------|----|-------|
| Tumor imaging                       | FET                       | 16.5 | Bladder               | 60    | 7  | (125) |
| Tumor imaging                       | fluoropaclitaxel          | 28.8 | Gallbladder           | 229.5 | 3  | (126) |
| Tumor imaging                       | fluoro-l-proline          | 15.1 | Bladder               | 44.1  | 6  | (127) |
| Tumor imaging                       | BAY 94-9392 (FSPG)        | 32   | Bladder               | 400   | 5  | (128) |
| Tumor imaging                       | FFNP                      | 20   | Gallbladder           | 113   | 12 | (129) |
| Tumor imaging                       | ISO-1                     | 16   | Gallbladder           | 91    | 12 | (130) |
| Tumor imaging                       | NMK36                     | 13.8 | Liver                 | 40.6  | 6  | (131) |
| Tumor imaging                       | SKI                       | 25.8 | Colon                 | 167   | 5  | (132) |
| Tumor imaging                       | (2S, 4R)4-fluoroglutamine | 19.4 | Uterus                | 54.9  | 6  | (133) |
| Tumor imaging                       | (2S, 4R)4-fluoroglutamine | 18.9 | Bladder               | 186   | 6  | (134) |
| Tumor imaging                       | FdCyd                     | 21.2 | Bladder               | 79.6  | 5  | (135) |
| Tumor imaging                       | Fludarabine               | 10.4 | Spleen                | 37.5  | 10 | (136) |
| Tumor imaging                       | D4-FCH                    | 25   | Kidney                | 106   | 8  | (137) |
| Tumor imaging                       | BAY 86-9596               | 16.2 | N/A                   | N/A   | 5  | (138) |
| Tumor imaging                       | FMP                       | 13   | N/A                   | N/A   | 5  | (139) |
| Tumor imaging                       | BAY 85-8050 (TIM-1)       | 8.8  | Kidney                | 25.3  | 5  | (140) |
| Tumor imaging                       | FAP1-74                   | 14.1 | Bladder               | 75.8  | 10 | (141) |
| Vesicular acetylcholine transporter | VAT                       | 12   | Gallbladder           | 104   | 3  | (142) |
| Vesicular acetylcholine transporter | FEOBV                     | 22.6 | Upper large intestine | 101   | 3  | (143) |
| Vesicular monoamine transporter     | FP-(+)-DTBZ               | 27.8 | Pancreas              | 153.3 | 9  | (144) |

When separate doses for men and women or for different ethnicities are reported, the average value was used. Doses to children were not considered.

<sup>a</sup> Value estimated from the data reported in the original paper (estimations taken from (65))

<sup>b</sup> Effective dose equivalent (EDE). Tracers for which the dosimetry is expressed as EDE are not included in the mean  $\pm$  SD of the tracer doses, nor in Figure 1

<sup>c</sup> Effective dose is estimated to be higher than total-body dose by approximately a factor of two (45).

<sup>d</sup> Residence times were calculated with a variable number of subjects pooled from different biodistribution studies (45).

<sup>e</sup> Risk-weighted absorbed dose coefficient

## References

1. Barret O, Hannestad J, Vala C, et al. Characterization in humans of 18F-MNI-444, a PET radiotracer for brain adenosine 2A receptors. *J Nucl Med*. 2015;56:586-591.
2. Herzog H, Elmenhorst D, Winz O, Bauer A. Biodistribution and radiation dosimetry of the A1 adenosine receptor ligand 18F-CPFPX determined from human whole-body PET. *Eur J Nucl Med Mol Imaging*. 2008;35:1499-1506.
3. Watabe T, Naka S, Soeda F, et al. First in human dosimetry of 18F-NKO-035: a new PET probe targeting L-type amino acid transporter 1 (LAT1). *Journal of Nuclear Medicine*. 2020;61:627.
4. Li Z, Li J, Yang Z, Liu Z. Pilot Study of 18F-BF3-Tyr in Healthy Volunteers and Glioma Patients. *Journal of Nuclear Medicine*. 2020;61:1216.
5. Høglund J, Shirvan A, Antoni G, et al. 18F-ML-10, a PET tracer for apoptosis: first human study. *J Nucl Med*. 2011;52:720-725.
6. Doss M, Kolb HC, Walsh JC, et al. Biodistribution and radiation dosimetry of 18F-CP-18, a potential apoptosis imaging agent, as determined from PET/CT scans in healthy volunteers. *J Nucl Med*. 2013;54:2087-2092.
7. Nishii R, Higashi T, Kagawa S, et al. (18)F-FPYBF-2, a new F-18 labelled amyloid imaging PET tracer: biodistribution and radiation dosimetry assessment of first-in-man (18)F-FPYBF-2 PET imaging. *Ann Nucl Med*. 2018;32:256-263.
8. Kim BI, Ha J-H, Lee KC, et al. First in human imaging of amyloid deposition in Alzheimer disease using the [18F]FC119S. *Journal of Nuclear Medicine*. 2013;54:1803.
9. Shidahara M, Tashiro M, Okamura N, et al. Evaluation of the biodistribution and radiation dosimetry of the 18F-labelled amyloid imaging probe [18F]FACT in humans. *EJNMMI Res*. 2013;3:32.
10. Koole M, Lewis DM, Buckley C, et al. Whole-body biodistribution and radiation dosimetry of 18F-GE067: a radioligand for in vivo brain amyloid imaging. *J Nucl Med*. 2009;50:818-822.
11. Senda M, Sasaki M, Fujikawa K, Paterson C, McParland B. Biodistribution and radiation dosimetry of Flutemetamol (18F) injection in Japanese healthy volunteers. *Journal of Nuclear Medicine*. 2012;53:1510.

12. O'Keefe GJ, Saunder TH, Ng S, et al. Radiation dosimetry of beta-amyloid tracers 11C-PiB and 18F-BAY94-9172. *J Nucl Med*. 2009;50:309-315.
13. Sattler B, Seese A, Barthel H, et al. Radiation risk caused by [F18]BAY 94-9172, a new PET tracer for detection of cerebral  $\beta$ -amyloid plaques. *Journal of Nuclear Medicine*. 2009;50:1840.
14. Adler L, Wolodzko J, Stabin M, McNelis T, Gammage L, Joshi A. Radiation dosimetry of F18-AV-45 measured by PET/CT in humans. *Journal of Nuclear Medicine*. 2008;49 (Suppl 1:283).
15. Wong DF, Rosenberg PB, Zhou Y, et al. In vivo imaging of amyloid deposition in Alzheimer disease using the radioligand 18F-AV-45 (florbetapir [corrected] F 18). *J Nucl Med*. 2010;51:913-920.
16. Lin KJ, Hsu WC, Hsiao IT, et al. Whole-body biodistribution and brain PET imaging with [18F]AV-45, a novel amyloid imaging agent--a pilot study. *Nucl Med Biol*. 2010;37:497-508.
17. Joshi AD, Pontecorvo MJ, Adler L, et al. Radiation dosimetry of florbetapir F 18. *EJNMMI Res*. 2014;4:4.
18. Nakano M, Nakamura T, Takita Y, et al. Radiation dosimetry and pharmacokinetics of florbetapir ((18)F) in Japanese subjects. *Ann Nucl Med*. 2019;33:639-645.
19. Arakawa R, Takano A, Stenkrona P, et al. PET imaging of beta-secretase 1 in the human brain: radiation dosimetry, quantification, and test-retest examination of [18F]PF-06684511. *European Journal of Nuclear Medicine and Molecular Imaging*. 2020.
20. Kurdziel KA, Shih JH, Apolo AB, et al. The kinetics and reproducibility of 18F-sodium fluoride for oncology using current PET camera technology. *J Nucl Med*. 2012;53:1175-1184.
21. Sakata M, Oda K, Toyohara J, Ishii K, Nariai T, Ishiwata K. Direct comparison of radiation dosimetry of six PET tracers using human whole-body imaging and murine biodistribution studies. *Ann Nucl Med*. 2013;27:285-296.
22. Kono Y, Kurihara H, Kawamoto H, et al. Radiation absorbed dose estimates for 18F-BPA PET. *Acta Radiol*. 2017;58:1094-1100.
23. Terry GE, Hirvonen J, Liow JS, et al. Biodistribution and dosimetry in humans of two inverse agonists to image cannabinoid CB1 receptors using positron emission tomography. *Eur J Nucl Med Mol Imaging*. 2010;37:1499-1506.

24. Van Laere K, Koole M, Sanabria Bohorquez SM, et al. Whole-body biodistribution and radiation dosimetry of the human cannabinoid type-1 receptor ligand 18F-MK-9470 in healthy subjects. *J Nucl Med.* 2008;49:439-445.
25. Raffel DM, Jung YW, Koeppe RA, et al. First-in-Human Studies of [(18)F] Fluorohydroxyphenethylguanidines. *Circ Cardiovasc Imaging.* 2018;11:e007965.
26. Challapalli A, Kenny LM, Hallett WA, et al. 18F-ICMT-11, a caspase-3-specific PET tracer for apoptosis: biodistribution and radiation dosimetry. *J Nucl Med.* 2013;54:1551-1556.
27. Somer EJ, Owenius R, Wall A, Antoni G, Thibblin A, Sorensen J. The clinical safety, biodistribution and internal radiation dosimetry of [(18)F]AH113804 in healthy adult volunteers. *EJNMMI Res.* 2016;6:87.
28. Barrio MJ, Spick C, Radu CG, et al. Human Biodistribution and Radiation Dosimetry of (18)F-Clofarabine, a PET Probe Targeting the Deoxyribonucleoside Salvage Pathway. *J Nucl Med.* 2017;58:374-378.
29. Schwarzenberg J, Radu CG, Benz M, et al. Human biodistribution and radiation dosimetry of novel PET probes targeting the deoxyribonucleoside salvage pathway. *Eur J Nucl Med Mol Imaging.* 2011;38:711-721.
30. Benz M, Radu C, Allen-Auerbach M, et al. Human biodistribution and dosimetry of the nucleoside analogue [18F]FAC in humans. *Journal of Nuclear Medicine.* 2008;49:284P.
31. Kessler RM, Mason NS, Jones C, Ansari MS, Manning RG, Price RR. [18F]N-allyl-5-fluoropropylepidepride (Fallypride): Radiation dosimetry. Quantification of striatal and extrastriatal dopamine receptors in man. *Neuroimage.* 2000;11:S32.
32. Doot RK, Dubroff JG, Scheuermann JS, et al. Validation of gallbladder absorbed radiation dose reduction simulation: human dosimetry of [(18)F]fluortriopride. *EJNMMI Phys.* 2018;5:21.
33. Lizana H, Johansson L, Axelsson J, et al. Whole-Body Biodistribution and Dosimetry of the Dopamine Transporter Radioligand (18)F-FE-PE2I in Human Subjects. *J Nucl Med.* 2018;59:1275-1280.
34. Robeson W, Dhawan V, Belakhlef A, et al. Dosimetry of the dopamine transporter radioligand 18F-FPCIT in human subjects. *J Nucl Med.* 2003;44:961-966.
35. Brown WD, Oakes TR, DeJesus OT, et al. Fluorine-18-fluoro-L-DOPA dosimetry with carbidopa pretreatment. *J Nucl Med.* 1998;39:1884-1891.

- 36.** Beauregard JM, Croteau E, Ahmed N, van Lier JE, Benard F. Assessment of human biodistribution and dosimetry of 4-fluoro-11beta-methoxy-16alpha-18F-fluoroestradiol using serial whole-body PET/CT. *J Nucl Med.* 2009;50:100-107.
- 37.** Mankoff DA, Peterson LM, Tewson TJ, et al. [18F]fluoroestradiol radiation dosimetry in human PET studies. *J Nucl Med.* 2001;42:679-684.
- 38.** Dubash SR, Keat N, Kozlowski K, et al. Clinical translation of (18)F-fluoropivalate - a PET tracer for imaging short-chain fatty acid metabolism: safety, biodistribution, and dosimetry in fed and fasted healthy volunteers. *Eur J Nucl Med Mol Imaging.* 2020.
- 39.** Laforest R, Delano D, Dence C, et al. PET/CT biodistribution and dosimetry of [18F]-FluorBetaOx in humans. *Journal of Nuclear Medicine.* 2013;54:1029.
- 40.** Gnesin S, Muller J, Burger IA, et al. Radiation dosimetry of (18)F-AzaFol: A first in-human use of a folate receptor PET tracer. *EJNMMI Res.* 2020;10:32.
- 41.** Smolarz K, Krause BJ, Schmelz Y, et al. Human biodistribution and radiation dosimetry of BAY 86-4367: A F-18 labeled bombesin antagonist for PET/CT imaging of prostate cancer. *Journal of Nuclear Medicine.* 2011;52:1456.
- 42.** Sah BR, Burger IA, Schibli R, et al. Dosimetry and first clinical evaluation of the new 18F-radiolabeled bombesin analogue BAY 864367 in patients with prostate cancer. *J Nucl Med.* 2015;56:372-378.
- 43.** Yaghoubi S, Barrio JR, Dahlbom M, et al. Human pharmacokinetic and dosimetry studies of [(18)F]FHBG: a reporter probe for imaging herpes simplex virus type-1 thymidine kinase reporter gene expression. *J Nucl Med.* 2001;42:1225-1234.
- 44.** Deloar HM, Fujiwara T, Shidahara M, et al. Estimation of absorbed dose for 2-[F-18]fluoro-2-deoxy-D-glucose using whole-body positron emission tomography and magnetic resonance imaging. *Eur J Nucl Med.* 1998;25:565-574.
- 45.** Hays MT, Watson EE, Thomas SR, Stabin M. MIRD dose estimate report no. 19: radiation absorbed dose estimates from (18)F-FDG. *J Nucl Med.* 2002;43:210-214.
- 46.** Staaf J, Jacobsson H, Sanchez-Crespo A. A revision of the organ radiation doses from 2-fluoro-2-deoxy-D-glucose with reference to tumour presence. *Radiat Prot Dosimetry.* 2012;151:43-50.

47. Srinivasan S, Crandall JP, Gajwani P, et al. Human Radiation Dosimetry for Orally and Intravenously Administered 18F-FDG. *Journal of Nuclear Medicine*. 2020;61:613-619.
48. Quinn B, Dauer Z, Pandit-Taskar N, Schoder H, Dauer LT. Radiation dosimetry of 18F-FDG PET/CT: incorporating exam-specific parameters in dose estimates. *BMC Med Imaging*. 2016;16:41.
49. Joshi AD, Sanabria-Bohorquez SM, Bormans G, et al. Characterization of the novel GlyT1 PET tracer [18F]MK-6577 in humans. *Synapse*. 2015;69:33-40.
50. Lee N, Oh I, Chae SY, et al. Radiation dosimetry of [(18)F]GP1 for imaging activated glycoprotein IIb/IIIa receptors with positron emission tomography in patients with acute thromboembolism. *Nucl Med Biol*. 2019;72-73:45-48.
51. Koole M, Van Weehaeghe D, Serdons K, et al. Clinical validation of the novel HDAC6 radiotracer [18F]EKZ-001 in the human brain. *European Journal of Nuclear Medicine and Molecular Imaging*. 2020.
52. Graham MM, Peterson LM, Link JM, et al. Fluorine-18-fluoromisonidazole radiation dosimetry in imaging studies. *J Nucl Med*. 1997;38:1631-1636.
53. Tolvanen T, Lehtio K, Kulmala J, et al. 18F-Fluoroerythronitroimidazole radiation dosimetry in cancer studies. *J Nucl Med*. 2002;43:1674-1680.
54. Lin LL, Silvonemi A, Stubbs JB, et al. Radiation dosimetry and biodistribution of the hypoxia tracer (1)(8)F-EF5 in oncologic patients. *Cancer Biother Radiopharm*. 2012;27:412-419.
55. Koch CJ, Scheuermann JS, Divgi C, et al. Biodistribution and dosimetry of (18)F-EF5 in cancer patients with preliminary comparison of (18)F-EF5 uptake versus EF5 binding in human glioblastoma. *Eur J Nucl Med Mol Imaging*. 2010;37:2048-2059.
56. Watanabe S, Shiga T, Hirata K, et al. Biodistribution and radiation dosimetry of the novel hypoxia PET probe [(18)F]DiFA and comparison with [(18)F]FMISO. *EJNMMI Res*. 2019;9:60.
57. Savi A, Incerti E, Fallanca F, et al. First Evaluation of PET-Based Human Biodistribution and Dosimetry of (18)F-FAZA, a Tracer for Imaging Tumor Hypoxia. *J Nucl Med*. 2017;58:1224-1229.
58. Doss M, Zhang JJ, Belanger MJ, et al. Biodistribution and radiation dosimetry of the hypoxia marker 18F-HX4 in monkeys and humans determined by using whole-body PET/CT. *Nucl Med Commun*. 2010;31:1016-1024.

59. Zhu W, Yao S, Xing H, et al. Biodistribution and Radiation Dosimetry of the Enterobacteriaceae-Specific Imaging Probe [(18)F]Fluorodeoxysorbitol Determined by PET/CT in Healthy Human Volunteers. *Mol Imaging Biol.* 2016;18:782-787.
60. Haubner R, Weber WA, Beer AJ, et al. Noninvasive visualization of the activated alphavbeta3 integrin in cancer patients by positron emission tomography and [18F]Galacto-RGD. *PLoS Med.* 2005;2:e70.
61. Doss M, Kolb HC, Zhang JJ, et al. Biodistribution and radiation dosimetry of the integrin marker 18F-RGD-K5 determined from whole-body PET/CT in monkeys and humans. *J Nucl Med.* 2012;53:787-795.
62. Mitra ES, Goris ML, Iagaru AH, et al. Pilot pharmacokinetic and dosimetric studies of (18)F-FPPRGD2: a PET radiopharmaceutical agent for imaging alpha(v)beta(3) integrin levels. *Radiology.* 2011;260:182-191.
63. Ma X, Wang S, Wang S, et al. Biodistribution, Radiation Dosimetry, and Clinical Application of a Melanin-Targeted PET Probe, (18)F-P3BZA, in Patients. *J Nucl Med.* 2019;60:16-22.
64. Zanotti-Fregonara P, Xu R, Zoghbi SS, et al. The PET Radioligand 18F-FIMX Images and Quantifies Metabotropic Glutamate Receptor 1 in Proportion to the Regional Density of Its Gene Transcript in Human Brain. *J Nucl Med.* 2016;57:242-247.
65. Kimura Y, Simeon FG, Hatazawa J, et al. Biodistribution and radiation dosimetry of a positron emission tomographic ligand, 18F-SP203, to image metabotropic glutamate subtype 5 receptors in humans. *Eur J Nucl Med Mol Imaging.* 2010;37:1943-1949.
66. Sah BR, Sommerauer M, Mu L, et al. Radiation dosimetry of [(18)F]-PSS232-a PET radioligand for imaging mGlu5 receptors in humans. *EJNMMI Res.* 2019;9:56.
67. Kessler RM, Seibyl J, Cowan RL, et al. Radiation Dosimetry of (18)F-FPEB in Humans. *J Nucl Med.* 2014;55:1119-1121.
68. Wong DF, Waterhouse R, Kuwabara H, et al. 18F-FPEB, a PET radiopharmaceutical for quantifying metabotropic glutamate 5 receptors: a first-in-human study of radiochemical safety, biokinetics, and radiation dosimetry. *J Nucl Med.* 2013;54:388-396.
69. Senthamizhchelvan S, Chaudhry M, Ravert H, et al. Human biodistribution and radiation dosimetry of 18F-fluorobenzyltriphenyl phosphonium. *Journal of Nuclear Medicine.* 2012;53:1512.



- 70.** Pain CD, O'Keefe GJ, Ackermann U, Dore V, Villemagne VL, Rowe CC. Human biodistribution and internal dosimetry of 4-[<sup>18</sup>F]fluorobenzyl-dexetimide: a PET radiopharmaceutical for imaging muscarinic acetylcholine receptors in the brain and heart. *EJNMMI Research*. 2020;10:61.
- 71.** Maddahi J, Czernin J, Lazewatsky J, et al. Phase I, first-in-human study of BMS747158, a novel <sup>18</sup>F-labeled tracer for myocardial perfusion PET: dosimetry, biodistribution, safety, and imaging characteristics after a single injection at rest. *J Nucl Med*. 2011;52:1490-1498.
- 72.** Elmaleh D, Kardan A, Barrow S, et al. A phase I study evaluating dosimetry and myocardial pharmacokinetic behavior of BFPET, a new F-18 labeled tracer for myocardial perfusion imaging. *Journal of Nuclear Medicine*. 2009;50:420.
- 73.** Pandit-Taskar N, Zanzonico P, Staton KD, et al. Biodistribution and Dosimetry of (<sup>18</sup>F)-Meta-Fluorobenzylguanidine: A First-in-Human PET/CT Imaging Study of Patients with Neuroendocrine Malignancies. *J Nucl Med*. 2018;59:147-153.
- 74.** Betthausen TJ, Hillmer AT, Lao PJ, et al. Human biodistribution and dosimetry of [(<sup>18</sup>F)]nifene, an alpha4beta2\* nicotinic acetylcholine receptor PET tracer. *Nucl Med Biol*. 2017;55:7-11.
- 75.** Bottlaender M, Valette H, Roumenov D, et al. Biodistribution and radiation dosimetry of <sup>18</sup>F-fluoro-A-85380 in healthy volunteers. *J Nucl Med*. 2003;44:596-601.
- 76.** Kimes AS, Horti AG, London ED, et al. 2-[<sup>18</sup>F]F-A-85380: PET imaging of brain nicotinic acetylcholine receptors and whole body distribution in humans. *FASEB J*. 2003;17:1331-1333.
- 77.** Obrzut SL, Koren AO, Mandelkern MA, Brody AL, Hoh CK, London ED. Whole-body radiation dosimetry of 2-[<sup>18</sup>F]Fluoro-A-85380 in human PET imaging studies. *Nucl Med Biol*. 2005;32:869-874.
- 78.** Sattler B, Kranz M, Starke A, et al. Internal dose assessment of (-)-<sup>18</sup>F-flubatine, comparing animal model datasets of mice and piglets with first-in-human results. *J Nucl Med*. 2014;55:1885-1892.
- 79.** Wong DF, Kuwabara H, Kim J, et al. PET imaging of high-affinity alpha4beta2 nicotinic acetylcholine receptors in humans with <sup>18</sup>F-AZAN, a radioligand with optimal brain kinetics. *J Nucl Med*. 2013;54:1308-1314.
- 80.** Sattler B, Wilke S, Starke A, et al. Radiation exposure by (-)-F18-NCFHEB, a new PET tracer for imaging of cerebral alpha4beta2 nicotinic acetylcholine receptors (nAChRs). *Journal of Nuclear Medicine*. 2011;52:1459.

- 81.** Herrero P, Laforest R, Shoghi K, et al. Feasibility and dosimetry studies for <sup>18</sup>F-NOS as a potential PET radiopharmaceutical for inducible nitric oxide synthase in humans. *J Nucl Med.* 2012;53:994-1001.
- 82.** Sinusas AJ, Lazewatsky J, Brunetti J, et al. Biodistribution and radiation dosimetry of LMI1195: first-in-human study of a novel <sup>18</sup>F-labeled tracer for imaging myocardial innervation. *J Nucl Med.* 2014;55:1445-1451.
- 83.** Takano A, Halldin C, Varrone A, et al. Biodistribution and radiation dosimetry of the norepinephrine transporter radioligand (S,S)-[<sup>18</sup>F]FMeNER-D2: a human whole-body PET study. *Eur J Nucl Med Mol Imaging.* 2008;35:630-636.
- 84.** Lee JH, Liow JS, Paul S, et al. PET quantification of brain O-GlcNAcase with [(18)F]LSN3316612 in healthy human volunteers. *EJNMMI Res.* 2020;10:20.
- 85.** Koole M, Schmidt ME, Hijzen A, et al. (<sup>18</sup>F)-JNJ-64413739, a Novel PET Ligand for the P2X7 Ion Channel: Radiation Dosimetry, Kinetic Modeling, Test-Retest Variability, and Occupancy of the P2X7 Antagonist JNJ-54175446. *J Nucl Med.* 2019;60:683-690.
- 86.** Van Laere K, Ahmad RU, Hudyana H, et al. Human biodistribution and dosimetry of <sup>18</sup>F-JNJ42259152, a radioligand for phosphodiesterase 10A imaging. *Eur J Nucl Med Mol Imaging.* 2013;40:254-261.
- 87.** Barret O, Thomae D, Tavares A, et al. In vivo assessment and dosimetry of 2 novel PDE10A PET radiotracers in humans: <sup>18</sup>F-MNI-659 and <sup>18</sup>F-MNI-654. *J Nucl Med.* 2014;55:1297-1304.
- 88.** Constantinescu C, Cole P, Brown T, et al. Radiation dosimetry and biodistribution of [<sup>18</sup>F]PF-05270430, a radiotracer for phosphodiesterase 2A (PDE2A) in rhesus macaques and humans. *Journal of Nuclear Medicine.* 2018;59:1012.
- 89.** Giussani A, Janzen T, Uusijarvi-Lizana H, et al. A compartmental model for biokinetics and dosimetry of <sup>18</sup>F-choline in prostate cancer patients. *J Nucl Med.* 2012;53:985-993.
- 90.** DeGrado TR, Reiman RE, Price DT, Wang S, Coleman RE. Pharmacokinetics and radiation dosimetry of <sup>18</sup>F-fluorocholine. *J Nucl Med.* 2002;43:92-96.
- 91.** Zanzonico PB, Finn R, Pentlow KS, et al. PET-based radiation dosimetry in man of <sup>18</sup>F-fluorodihydrotestosterone, a new radiotracer for imaging prostate cancer. *J Nucl Med.* 2004;45:1966-1971.

- 92.** McCall K, Abbott A, Hu J, et al. Report on the PET/CT image-based radiation dosimetry of <sup>18</sup>F-DHT in women, an imaging agent with new applications for evaluation of androgen receptor status in patients with metastatic breast cancer. *Journal of Nuclear Medicine*. 2019;60:1630.
- 93.** Cho SY, Gage KL, Mease RC, et al. Biodistribution, tumor detection, and radiation dosimetry of <sup>18</sup>F-DCFBC, a low-molecular-weight inhibitor of prostate-specific membrane antigen, in patients with metastatic prostate cancer. *J Nucl Med*. 2012;53:1883-1891.
- 94.** Hohberg M, Kobe C, Krapf P, et al. Biodistribution and radiation dosimetry of [(18)F]-JK-PSMA-7 as a novel prostate-specific membrane antigen-specific ligand for PET/CT imaging of prostate cancer. *EJNMMI Res*. 2019;9:66.
- 95.** Piron S, De Man K, Van Laeken N, et al. Radiation Dosimetry and Biodistribution of (18)F-PSMA-11 for PET Imaging of Prostate Cancer. *J Nucl Med*. 2019;60:1736-1742.
- 96.** Behr SC, Aggarwal R, VanBrocklin HF, et al. Phase I Study of CTT1057, an (18)F-Labeled Imaging Agent with Phosphoramidate Core Targeting Prostate-Specific Membrane Antigen in Prostate Cancer. *J Nucl Med*. 2019;60:910-916.
- 97.** Plyku D, Mena E, Rowe SP, et al. Combined model-based and patient-specific dosimetry for (18)F-DCFPyL, a PSMA-targeted PET agent. *Eur J Nucl Med Mol Imaging*. 2018;45:989-998.
- 98.** Szabo Z, Mena E, Rowe SP, et al. Initial Evaluation of [(18)F]DCFPyL for Prostate-Specific Membrane Antigen (PSMA)-Targeted PET Imaging of Prostate Cancer. *Mol Imaging Biol*. 2015;17:565-574.
- 99.** Giesel FL, Hadaschik B, Cardinale J, et al. F-18 labelled PSMA-1007: biodistribution, radiation dosimetry and histopathological validation of tumor lesions in prostate cancer patients. *Eur J Nucl Med Mol Imaging*. 2017;44:678-688.
- 100.** Saga T, Nakamoto Y, Ishimori T, et al. Initial evaluation of PET/CT with <sup>18</sup>F-FSU-880 targeting prostate-specific membrane antigen in prostate cancer patients. *Cancer Science*. 2019;110:742-750.
- 101.** Lee I, Lim I, Byun BH, et al. A microdose clinical trial to evaluate [<sup>18</sup>F]Florastamin as a positron emission tomography imaging agent in patients with prostate cancer. *European Journal of Nuclear Medicine and Molecular Imaging*. 2020.
- 102.** Beinat C, Patel CB, Haywood T, et al. Human biodistribution and radiation dosimetry of [(18)F]DASA-23, a PET probe targeting pyruvate kinase M2. *Eur J Nucl Med Mol Imaging*. 2020.

- 103.** Choi JY, Lyoo CH, Kim JS, Kim KM, Lee M, Ryu YH. Biodistribution and Radiation Dosimetry of [(18)F]Mefway in Humans. *Mol Imaging Biol.* 2016;18:803-806.
- 104.** Sattler B, Kranz M, Wuest N, et al. First-in-man incorporation dosimetry of (S)-(-)-[18F]fluspidine. *Journal of Nuclear Medicine.* 2016;57:1022.
- 105.** Hjernevik T, Cipriano PW, Shen B, et al. Biodistribution and Radiation Dosimetry of (18)F-FTC-146 in Humans. *J Nucl Med.* 2017;58:2004-2009.
- 106.** Jiang H, Schmit NR, Koenen AR, et al. Safety, pharmacokinetics, metabolism and radiation dosimetry of (18)F-tetrafluoroborate ((18)F-TFB) in healthy human subjects. *EJNMMI Res.* 2017;7:90.
- 107.** O'Doherty J, Jauregui-Osoro M, Brothwood T, et al. (18)F-Tetrafluoroborate, a PET Probe for Imaging Sodium/Iodide Symporter Expression: Whole-Body Biodistribution, Safety, and Radiation Dosimetry in Thyroid Cancer Patients. *J Nucl Med.* 2017;58:1666-1671.
- 108.** Pauwels E, Cleeren F, Tshibangu T, et al. [18F]AlF-NOTA-octreotide PET imaging: biodistribution, dosimetry and first comparison with [68Ga]Ga-DOTATATE in neuroendocrine tumour patients. *European Journal of Nuclear Medicine and Molecular Imaging.* 2020.
- 109.** Long T, Yang N, Zhou M, et al. Clinical Application of 18F-AlF-NOTA-Octreotide PET/CT in Combination With 18F-FDG PET/CT for Imaging Neuroendocrine Neoplasms. *Clinical Nuclear Medicine.* 2019;44:452-458.
- 110.** Sprague DR, Chin FT, Liow J-S, et al. Human biodistribution and radiation dosimetry of the tachykinin NK1 antagonist radioligand [<sup>18</sup>F]SPA-RQ: comparison of thin -slice, bisected, and 2-D planar image analysis. *Journal of Nuclear Medicine.* 2007;48:100-107.
- 111.** Bullich S, Barret O, Constantinescu C, et al. Evaluation of dosimetry, quantitative methods and test-retest variability of 18F-PI-2620 PET for the assessment of tau deposits in the human brain. *Journal of Nuclear Medicine.* 2019.
- 112.** Choi JY, Lyoo CH, Lee JH, et al. Human Radiation Dosimetry of [(18)F]AV-1451(T807) to Detect Tau Pathology. *Mol Imaging Biol.* 2016;18:479-482.
- 113.** Sanabria Bohorquez S, Marik J, Ogasawara A, et al. [(18)F]GTP1 (Genentech Tau Probe 1), a radioligand for detecting neurofibrillary tangle tau pathology in Alzheimer's disease. *Eur J Nucl Med Mol Imaging.* 2019;46:2077-2089.

- 114.** Koole M, Lohith TG, Valentine JL, et al. Preclinical Safety Evaluation and Human Dosimetry of [(18)F]MK-6240, a Novel PET Tracer for Imaging Neurofibrillary Tangles. *Mol Imaging Biol.* 2020;22:173-180.
- 115.** Wong DF, Comley RA, Kuwabara H, et al. Characterization of 3 Novel Tau Radiopharmaceuticals, (11)C-RO-963, (11)C-RO-643, and (18)F-RO-948, in Healthy Controls and in Alzheimer Subjects. *J Nucl Med.* 2018;59:1869-1876.
- 116.** Hsiao IT, Lin KJ, Huang KL, et al. Biodistribution and Radiation Dosimetry for the Tau Tracer (18)F-THK-5351 in Healthy Human Subjects. *J Nucl Med.* 2017;58:1498-1503.
- 117.** Schmidt ME, Janssens L, Moechars D, et al. Clinical evaluation of [18F] JNJ-64326067, a novel candidate PET tracer for the detection of tau pathology in Alzheimer's disease. *European Journal of Nuclear Medicine and Molecular Imaging.* 2020.
- 118.** Fujimura Y, Kimura Y, Simeon FG, et al. Biodistribution and radiation dosimetry in humans of a new PET ligand, (18)F-PBR06, to image translocator protein (18 kDa). *J Nucl Med.* 2010;51:145-149.
- 119.** Mizrahi R, Rusjan PM, Vitcu I, et al. Whole Body Biodistribution and Radiation Dosimetry in Humans of a New PET Ligand, [(18)F]-FEPPA, to Image Translocator Protein (18 kDa). *Mol Imaging Biol.* 2012.
- 120.** Boellaard R, Sparks R, Hoffman A, et al. Radiation dose of [18F]DPA714 PET studies. *Journal of Nuclear Medicine.* 2011;52:1453.
- 121.** Hino-Shishikura A, Suzuki A, Minamimoto R, et al. Biodistribution and radiation dosimetry of [(1)(8)F]-5-fluorouracil. *Appl Radiat Isot.* 2013;75:11-17.
- 122.** Vesselle H, Grierson J, Peterson LM, Muzi M, Mankoff DA, Krohn KA. 18F-Fluorothymidine radiation dosimetry in human PET imaging studies. *J Nucl Med.* 2003;44:1482-1488.
- 123.** Nye JA, Schuster DM, Yu W, Camp VM, Goodman MM, Votaw JR. Biodistribution and radiation dosimetry of the synthetic nonmetabolized amino acid analogue anti-18F-FACBC in humans. *J Nucl Med.* 2007;48:1017-1020.
- 124.** McParland BJ, Wall A, Johansson S, Sorensen J. The clinical safety, biodistribution and internal radiation dosimetry of [(1)(8)F]fluciclovine in healthy adult volunteers. *Eur J Nucl Med Mol Imaging.* 2013;40:1256-1264.

- 125.** Pauleit D, Floeth F, Herzog H, et al. Whole-body distribution and dosimetry of O-(2-[18F]fluoroethyl)-L-tyrosine. *Eur J Nucl Med Mol Imaging.* 2003;30:519-524.
- 126.** Kurdziel KA, Kalen JD, Hirsch JI, et al. Human dosimetry and preliminary tumor distribution of 18F-fluoropaclitaxel in healthy volunteers and newly diagnosed breast cancer patients using PET/CT. *J Nucl Med.* 2011;52:1339-1345.
- 127.** Borner AR, Langen KJ, Herzog H, et al. Whole-body kinetics and dosimetry of cis-4-[(18F]fluoro-L-proline. *Nucl Med Biol.* 2001;28:287-292.
- 128.** Smolarz K, Krause BJ, Graner FP, et al. (S)-4-(3-18F-Fluoropropyl)-L-Glutamic Acid: An 18F-Labeled Tumor-Specific Probe for PET/CT Imaging--Dosimetry. *J Nucl Med.* 2013.
- 129.** Dehdashti F, Laforest R, Gao F, et al. Assessment of progesterone receptors in breast carcinoma by PET with 21-18F-fluoro-16alpha,17alpha-[(R)-(1'-alpha-furylmethylidene)dioxy]-19-norpregn-4-ene-3,20-dione. *J Nucl Med.* 2012;53:363-370.
- 130.** Dehdashti F, Laforest R, Gao F, et al. Assessment of Cellular Proliferation in Tumors by PET Using 18F-ISO-1. *J Nucl Med.* 2013;54:350-357.
- 131.** Asano Y, Inoue Y, Ikeda Y, et al. Phase I clinical study of NMK36: a new PET tracer with the synthetic amino acid analogue anti-[18F]FACBC. *Ann Nucl Med.* 2011;25:414-418.
- 132.** Krebs S, Veach DR, Carter LM, et al. First-in-Human Trial of Dasatinib-Derivative Tracer for Tumor Kinase-Targeted Positron Emission Tomography. *J Nucl Med.* 2020.
- 133.** Xu X, Zhu H, Liu F, et al. Dynamic PET/CT imaging of (18F)-(2S, 4R)4-fluoroglutamine in healthy volunteers and oncological patients. *Eur J Nucl Med Mol Imaging.* 2020.
- 134.** Venneti S, Dunphy MP, Zhang H, et al. Glutamine-based PET imaging facilitates enhanced metabolic evaluation of gliomas in vivo. *Sci Transl Med.* 2015;7:274ra217.
- 135.** Young CR, Adler S, Eary JF, et al. Biodistribution, Tumor Detection, and Radiation Dosimetry of (18F)-5-Fluoro-2'-Deoxycytidine with Tetrahydrouridine in Solid Tumors. *J Nucl Med.* 2019;60:492-496.
- 136.** Chantepie S, Hovhannisyan N, Guillouet S, et al. (18F)-Fludarabine PET for Lymphoma Imaging: First-in-Humans Study on DLBCL and CLL Patients. *J Nucl Med.* 2018;59:1380-1385.

- 137.** Challapalli A, Sharma R, Hallett WA, et al. Biodistribution and radiation dosimetry of deuterium-substituted 18F-fluoromethyl-[1, 2-<sup>2</sup>H<sub>4</sub>]choline in healthy volunteers. *J Nucl Med.* 2014;55:256-263.
- 138.** de Jong J, Kowal K, Zitzmann-Kolbe S, et al. Radiation dosimetry and biodistribution of BAY86-9596 (O-([<sup>18</sup>F]fluoromethyl)-D-tyrosine). *Journal of Nuclear Medicine.* 2011;52:1455.
- 139.** Caveliers V, Kersemans K, Lahoutte T, et al. Human biodistribution, dosimetry and initial clinical results of 2-18F-fluoromethyl-L-phenylalanine, a new tumor tracer for PET. *Journal of Nuclear Medicine.* 2008;49:282P.
- 140.** Krause BJ, Smolarz K, Graner F-P, et al. [<sup>18</sup>F]BAY 85-8050 (TIM-1): A novel tumor specific probe for PET/CT imaging - Dosimetry. *Journal of Nuclear Medicine.* 2010;51:1434.
- 141.** Giesel F, Adeberg S, Syed M, et al. FAPI-74 PET/CT Using Either 18F-AIF or Cold-kit 68Ga-labeling: Biodistribution, Radiation Dosimetry and Tumor Delineation in Lung Cancer Patients. *Journal of Nuclear Medicine.* 2020.
- 142.** Laforest R, Lui H, HUsain J, Cummings K, Perlmutter J, Tu Z. Radiation Dosimetry on 18F-VAT in human. *Journal of Nuclear Medicine.* 2018;59:1002.
- 143.** Petrou M, Frey KA, Kilbourn MR, et al. In vivo imaging of human cholinergic nerve terminals with (-)-5-(18)F-fluoroethoxybenzovesamicol: biodistribution, dosimetry, and tracer kinetic analyses. *J Nucl Med.* 2014;55:396-404.
- 144.** Lin KJ, Weng YH, Wey SP, et al. Whole-body biodistribution and radiation dosimetry of 18F-FP-(+)-DTBZ (18F-AV-133): a novel vesicular monoamine transporter 2 imaging agent. *J Nucl Med.* 2010;51:1480-1485.

Table 3: Tracers for which the human dosimetry has been estimated more than once. When the target organ is the same in both studies, their doses and their relative differences are reported.

|                              | Effective dose<br>( $\mu\text{Sv}/\text{MBq}$ ) | Relative<br>difference (%) | Target organ | Dose to the target<br>organ ( $\mu\text{Sv}/\text{MBq}$ ) | Relative<br>difference<br>(%) | References |
|------------------------------|-------------------------------------------------|----------------------------|--------------|-----------------------------------------------------------|-------------------------------|------------|
| <b><sup>11</sup>C Tracer</b> |                                                 |                            |              |                                                           |                               |            |
| ITMM <sup>a</sup>            | 4.4                                             | 4.6                        | Bladder      | 12.5                                                      | 5.6                           | (1)        |
|                              | 4.6                                             |                            | Bladder      | 13.2                                                      |                               | (2)        |
| Pib                          | 4.7                                             | 12.8                       | Gallbladder  | 41.5                                                      | 8                             | (3)        |
|                              | 5.3                                             |                            | Gallbladder  | 44.8                                                      |                               | (4)        |
| Raclopride                   | 6.3                                             | 6.3                        | Gallbladder  |                                                           |                               | (5)        |
|                              | 6.7                                             |                            | Kidney       |                                                           |                               | (6)        |
| Flumazenil                   | 5.2                                             | 46.2                       | Bladder      | 36.8                                                      | 71.7                          | (7)        |
|                              | 7.6                                             |                            | Bladder      | 63.2                                                      |                               | (8)        |
| PK11195                      | 5.1                                             | N/A <sup>b</sup>           | Kidney       |                                                           |                               | (9)        |
|                              | 4.6 <sup>b</sup>                                |                            | Bladder      |                                                           |                               | (10)       |
| Acetate                      | 4.9                                             | 40                         | Pancreas     |                                                           |                               | (11)       |
|                              | 3.5                                             |                            | Kidney       |                                                           |                               | (12)       |
| <b><sup>18</sup>F Tracer</b> |                                                 |                            |              |                                                           |                               |            |
| BAY94-9172<br>(Florbetaben)  | 14.7                                            | 12.2                       | Gallbladder  | 132.4                                                     | 28.5                          | (4)        |
|                              | 16.5                                            |                            | Gallbladder  | 103                                                       |                               | (13)       |
| AV-45 (florbetapir)          | 16                                              | 48.5 <sup>c</sup>          | Gallbladder  | 150                                                       | 539 <sup>c</sup>              | (14)       |
|                              | 13                                              |                            | N/A          | N/A                                                       |                               | (15)       |
|                              | 19.3                                            |                            | Gallbladder  | 184.7                                                     |                               | (16)       |
|                              | 18.6                                            |                            | Gallbladder  | 143                                                       |                               | (17)       |
|                              | 17.8                                            |                            | Gallbladder  | 28.9                                                      |                               | (18)       |
| Flutemetamol<br>(GE067)      | 33.8                                            | 30                         | Gallbladder  |                                                           |                               | (19)       |
|                              | 26                                              |                            | Bladder      |                                                           |                               | (20)       |
| FBPA                         | 23.9                                            | 59.3                       | Kidney       |                                                           |                               | (21)       |
|                              | 15                                              |                            | Heart        |                                                           |                               | (22)       |
| FAC <sup>a</sup>             | 5.24                                            | 161.5                      | Bladder      | 20.4                                                      | 173                           | (23)       |
|                              | 13.7                                            |                            | Bladder      | 55.7                                                      |                               | (24)       |
| 16 $\alpha$ -F-estradiol     | 27                                              | N/A <sup>b</sup>           | Gallbladder  |                                                           |                               | (25)       |
|                              | 22 <sup>b</sup>                                 |                            | Liver        |                                                           |                               | (26)       |
| BAY 864367                   | 23                                              | 60.8                       | Gallbladder  |                                                           |                               | (27)       |
|                              | 14.3                                            |                            | Bladder      |                                                           |                               | (28)       |
| FDG                          | 29                                              | 93.3 <sup>c</sup>          | Bladder      | 94.2                                                      | 496.2 <sup>c</sup>            | (29)       |
|                              | 24 <sup>d</sup>                                 |                            | Bladder      | 310                                                       |                               | (30)       |
|                              | 15                                              |                            | Bladder      | 73                                                        |                               | (31)       |
|                              | 15.3                                            |                            | Bladder      | 52                                                        |                               | (32)       |
|                              | 19.9                                            |                            | Bladder      | 84.6                                                      |                               | (33)       |
| EF5                          | 18                                              | 27.8                       | Bladder      | 120                                                       | 41.7                          | (34)       |
|                              | 23                                              |                            | Bladder      | 170                                                       |                               | (35)       |
| FPEB                         | 25                                              | 47.9                       | Bladder      |                                                           |                               | (36)       |
|                              | 16.9                                            |                            | Gallbladder  |                                                           |                               | (37)       |



|                     |                   |                  |                 |      |                  |      |
|---------------------|-------------------|------------------|-----------------|------|------------------|------|
|                     | 19.4              |                  | Bladder         | 81.8 |                  | (38) |
| A-85380             | 39                | 101 <sup>c</sup> | Bladder         | 180  | 120 <sup>c</sup> | (39) |
|                     | 23.7              |                  | Bladder         | 153  |                  | (40) |
| F-choline           | 18 <sup>e</sup>   | N/A <sup>b</sup> | Kidney          | 79   | 115.2            | (41) |
|                     | 34.1 <sup>b</sup> |                  | Kidney          | 170  |                  | (42) |
| AIF-OC              | 22.4              | 3.1              | Spleen          | 159  | 12               | (43) |
|                     | 23.1              |                  | Spleen          | 142  |                  | (44) |
| FDHT                | 12.5 <sup>f</sup> | 60               | Bladder         | 86.8 | 42.3             | (45) |
|                     | 20                |                  | Bladder         | 61   |                  | (46) |
| DCFPyL <sup>a</sup> | 17                | 22.3             | Lacrimal glands |      |                  | (47) |
|                     | 13.9              |                  | Kidney          |      |                  | (48) |
| Tetrafluoroborate   | 50                | 53.4             | Thyroid         | 31   | 335.5            | (49) |
|                     | 32.6              |                  | Thyroid         | 135  |                  | (50) |
| FACBC (GE-148)      | 14.1              | 56.7             | Liver           |      |                  | (51) |
| (fluciclovine)      | 22.1              |                  | Pancreas        |      |                  | (52) |
| (2S, 4R)4-          | 19.4              | 2.6              | Uterus          |      |                  | (53) |
| fluoroglutamine     | 18.9              |                  | Bladder         |      |                  | (54) |

Relative differences are the ratio of the difference between the two values over the smaller value.

If one of the values is expressed as Effective Dose Equivalent, the difference is not calculated.

<sup>a</sup> Tracer for which both dosimetry studies were performed by the same team

<sup>b</sup> Effective Dose Equivalent

<sup>c</sup> Difference between the highest and lowest value

<sup>d</sup> Effective dose is estimated to be higher than total-body dose by approximately a factor of two

<sup>e</sup> Risk-weighted absorbed dose coefficient

<sup>f</sup> Value estimated from the data reported in the original paper (estimations taken from (55))

## References

1. Ito K, Sakata M, Oda K, et al. Comparison of dosimetry between PET/CT and PET alone using (11)C-ITMM. *Australas Phys Eng Sci Med.* 2016;39:177-186.
2. Toyohara J, Sakata M, Oda K, et al. Initial human PET studies of metabotropic glutamate receptor type 1 ligand 11C-ITMM. *J Nucl Med.* 2013;54:1302-1307.
3. Scheinin NM, Tolvanen TK, Wilson IA, Arponen EM, Nagren KA, Rinne JO. Biodistribution and radiation dosimetry of the amyloid imaging agent 11C-PIB in humans. *J Nucl Med.* 2007;48:128-133.
4. O'Keefe GJ, Saunderson TH, Ng S, et al. Radiation dosimetry of beta-amyloid tracers 11C-PiB and 18F-BAY94-9172. *J Nucl Med.* 2009;50:309-315.
5. Slifstein M, Hwang DR, Martinez D, et al. Biodistribution and radiation dosimetry of the dopamine D2 ligand 11C-raclopride determined from human whole-body PET. *J Nucl Med.* 2006;47:313-319.
6. Ribeiro MJ, Ricard M, Bourgeois S, et al. Biodistribution and radiation dosimetry of [11C]raclopride in healthy volunteers. *Eur J Nucl Med Mol Imaging.* 2005;32:952-958.
7. Nugent AC, Neumeister A, Drevets WC, Eckelman WC, Channing MA, Herscovitch P. Human biodistribution and dosimetry of the PET benzodiazepine receptor ligand 11C-flumazenil. *Journal of Nuclear Medicine.* 2004;45(suppl):434P.
8. Laymon CM, Narendran R, Mason NS, et al. Human biodistribution and dosimetry of the PET radioligand [(1)(1)C]flumazenil (FMZ). *Mol Imaging Biol.* 2012;14:115-122.
9. Hirvonen J, Roivainen A, Virta J, Helin S, Nagren K, Rinne JO. Human biodistribution and radiation dosimetry of 11C-(R)-PK11195, the prototypic PET ligand to image inflammation. *Eur J Nucl Med Mol Imaging.* 2010;37:606-612.
10. Kumar A, Muzik O, Chugani D, Chakraborty P, Chugani HT. PET-derived biodistribution and dosimetry of the benzodiazepine receptor-binding radioligand (11)C-(R)-PK11195 in children and adults. *J Nucl Med.* 2010;51:139-144.
11. Seltzer MA, Jahan SA, Sparks R, et al. Radiation dose estimates in humans for (11)C-acetate whole-body PET. *J Nucl Med.* 2004;45:1233-1236.
12. Liu D, Khong PL, Gao Y, et al. Radiation Dosimetry of Whole-Body Dual-Tracer 18F-FDG and 11C-Acetate PET/CT for Hepatocellular Carcinoma. *J Nucl Med.* 2016;57:907-912.

13. Sattler B, Seese A, Barthel H, et al. Radiation risk caused by [F18]BAY 94-9172, a new PET tracer for detection of cerebral  $\beta$ -amyloid plaques. *Journal of Nuclear Medicine*. 2009;50:1840.
14. Adler L, Wolodzko J, Stabin M, McNelis T, Gammage L, Joshi A. Radiation dosimetry of F18-AV-45 measured by PET/CT in humans. *Journal of Nuclear Medicine*. 2008;49 (Suppl 1:283).
15. Wong DF, Rosenberg PB, Zhou Y, et al. In vivo imaging of amyloid deposition in Alzheimer disease using the radioligand 18F-AV-45 (florbetapir [corrected] F 18). *J Nucl Med*. 2010;51:913-920.
16. Lin KJ, Hsu WC, Hsiao IT, et al. Whole-body biodistribution and brain PET imaging with [18F]AV-45, a novel amyloid imaging agent--a pilot study. *Nucl Med Biol*. 2010;37:497-508.
17. Joshi AD, Pontecorvo MJ, Adler L, et al. Radiation dosimetry of florbetapir F 18. *EJNMMI Res*. 2014;4:4.
18. Nakano M, Nakamura T, Takita Y, et al. Radiation dosimetry and pharmacokinetics of florbetapir ((18)F) in Japanese subjects. *Ann Nucl Med*. 2019;33:639-645.
19. Koole M, Lewis DM, Buckley C, et al. Whole-body biodistribution and radiation dosimetry of 18F-GE067: a radioligand for in vivo brain amyloid imaging. *J Nucl Med*. 2009;50:818-822.
20. Senda M, Sasaki M, Fujikawa K, Paterson C, McParland B. Biodistribution and radiation dosimetry of Flutemetamol (18F) injection in Japanese healthy volunteers. *Journal of Nuclear Medicine*. 2012;53:1510.
21. Sakata M, Oda K, Toyohara J, Ishii K, Nariai T, Ishiwata K. Direct comparison of radiation dosimetry of six PET tracers using human whole-body imaging and murine biodistribution studies. *Ann Nucl Med*. 2013;27:285-296.
22. Kono Y, Kurihara H, Kawamoto H, et al. Radiation absorbed dose estimates for 18F-BPA PET. *Acta Radiol*. 2017;58:1094-1100.
23. Schwarzenberg J, Radu CG, Benz M, et al. Human biodistribution and radiation dosimetry of novel PET probes targeting the deoxyribonucleoside salvage pathway. *Eur J Nucl Med Mol Imaging*. 2011;38:711-721.
24. Benz M, Radu C, Allen-Auerbach M, et al. Human biodistribution and dosimetry of the nucleoside analogue [18F]FAC in humans. *Journal of Nuclear Medicine*. 2008;49:284P.

25. Beaugregard JM, Croteau E, Ahmed N, van Lier JE, Benard F. Assessment of human biodistribution and dosimetry of 4-fluoro-11beta-methoxy-16alpha-18F-fluoroestradiol using serial whole-body PET/CT. *J Nucl Med.* 2009;50:100-107.
26. Mankoff DA, Peterson LM, Tewson TJ, et al. [18F]fluoroestradiol radiation dosimetry in human PET studies. *J Nucl Med.* 2001;42:679-684.
27. Smolarz K, Krause BJ, Schmelz Y, et al. Human biodistribution and radiation dosimetry of BAY 86-4367: A F-18 labeled bombesin antagonist for PET/CT imaging of prostate cancer. *Journal of Nuclear Medicine.* 2011;52:1456.
28. Sah BR, Burger IA, Schibli R, et al. Dosimetry and first clinical evaluation of the new 18F-radiolabeled bombesin analogue BAY 864367 in patients with prostate cancer. *J Nucl Med.* 2015;56:372-378.
29. Deloar HM, Fujiwara T, Shidahara M, et al. Estimation of absorbed dose for 2-[F-18]fluoro-2-deoxy-D-glucose using whole-body positron emission tomography and magnetic resonance imaging. *Eur J Nucl Med.* 1998;25:565-574.
30. Hays MT, Watson EE, Thomas SR, Stabin M. MIRD dose estimate report no. 19: radiation absorbed dose estimates from (18)F-FDG. *J Nucl Med.* 2002;43:210-214.
31. Staaf J, Jacobsson H, Sanchez-Crespo A. A revision of the organ radiation doses from 2-fluoro-2-deoxy-D-glucose with reference to tumour presence. *Radiat Prot Dosimetry.* 2012;151:43-50.
32. Srinivasan S, Crandall JP, Gajwani P, et al. Human Radiation Dosimetry for Orally and Intravenously Administered 18F-FDG. *Journal of Nuclear Medicine.* 2020;61:613-619.
33. Quinn B, Dauer Z, Pandit-Taskar N, Schoder H, Dauer LT. Radiation dosimetry of 18F-FDG PET/CT: incorporating exam-specific parameters in dose estimates. *BMC Med Imaging.* 2016;16:41.
34. Lin LL, Silvonemi A, Stubbs JB, et al. Radiation dosimetry and biodistribution of the hypoxia tracer (18)F-EF5 in oncologic patients. *Cancer Biother Radiopharm.* 2012;27:412-419.
35. Koch CJ, Scheuermann JS, Divgi C, et al. Biodistribution and dosimetry of (18)F-EF5 in cancer patients with preliminary comparison of (18)F-EF5 uptake versus EF5 binding in human glioblastoma. *Eur J Nucl Med Mol Imaging.* 2010;37:2048-2059.
36. Kessler RM, Seibyl J, Cowan RL, et al. Radiation Dosimetry of (18)F-FPEB in Humans. *J Nucl Med.* 2014;55:1119-1121.

37. Wong DF, Waterhouse R, Kuwabara H, et al. 18F-FPEB, a PET radiopharmaceutical for quantifying metabotropic glutamate 5 receptors: a first-in-human study of radiochemical safety, biokinetics, and radiation dosimetry. *J Nucl Med.* 2013;54:388-396.
38. Bottlaender M, Valette H, Roumenov D, et al. Biodistribution and radiation dosimetry of 18F-fluoro-A-85380 in healthy volunteers. *J Nucl Med.* 2003;44:596-601.
39. Kimes AS, Horti AG, London ED, et al. 2-[<sup>18</sup>F]F-A-85380: PET imaging of brain nicotinic acetylcholine receptors and whole body distribution in humans. *FASEB J.* 2003;17:1331-1333.
40. Obrzut SL, Koren AO, Mandelkern MA, Brody AL, Hoh CK, London ED. Whole-body radiation dosimetry of 2-[<sup>18</sup>F]Fluoro-A-85380 in human PET imaging studies. *Nucl Med Biol.* 2005;32:869-874.
41. Giussani A, Janzen T, Uusijarvi-Lizana H, et al. A compartmental model for biokinetics and dosimetry of 18F-choline in prostate cancer patients. *J Nucl Med.* 2012;53:985-993.
42. DeGrado TR, Reiman RE, Price DT, Wang S, Coleman RE. Pharmacokinetics and radiation dosimetry of 18F-fluorocholine. *J Nucl Med.* 2002;43:92-96.
43. Pauwels E, Cleeren F, Tshibangu T, et al. [<sup>18</sup>F]AlF-NOTA-octreotide PET imaging: biodistribution, dosimetry and first comparison with [<sup>68</sup>Ga]Ga-DOTATATE in neuroendocrine tumour patients. *European Journal of Nuclear Medicine and Molecular Imaging.* 2020.
44. Long T, Yang N, Zhou M, et al. Clinical Application of 18F-AlF-NOTA-Octreotide PET/CT in Combination With 18F-FDG PET/CT for Imaging Neuroendocrine Neoplasms. *Clinical Nuclear Medicine.* 2019;44:452-458.
45. Zanzonico PB, Finn R, Pentlow KS, et al. PET-based radiation dosimetry in man of 18F-fluorodihydrotestosterone, a new radiotracer for imaging prostate cancer. *J Nucl Med.* 2004;45:1966-1971.
46. McCall K, Abbott A, Hu J, et al. Report on the PET/CT image-based radiation dosimetry of 18FDHT in women, an imaging agent with new applications for evaluation of androgen receptor status in patients with metastatic breast cancer. *Journal of Nuclear Medicine.* 2019;60:1630.
47. Plyku D, Mena E, Rowe SP, et al. Combined model-based and patient-specific dosimetry for (18)F-DCFPyL, a PSMA-targeted PET agent. *Eur J Nucl Med Mol Imaging.* 2018;45:989-998.
48. Szabo Z, Mena E, Rowe SP, et al. Initial Evaluation of [(18)F]DCFPyL for Prostate-Specific Membrane Antigen (PSMA)-Targeted PET Imaging of Prostate Cancer. *Mol Imaging Biol.* 2015;17:565-574.

49. Jiang H, Schmit NR, Koenen AR, et al. Safety, pharmacokinetics, metabolism and radiation dosimetry of (18)F-tetrafluoroborate ((18)F-TFB) in healthy human subjects. *EJNMMI Res.* 2017;7:90.
50. O'Doherty J, Jauregui-Osoro M, Brothwood T, et al. (18)F-Tetrafluoroborate, a PET Probe for Imaging Sodium/Iodide Symporter Expression: Whole-Body Biodistribution, Safety, and Radiation Dosimetry in Thyroid Cancer Patients. *J Nucl Med.* 2017;58:1666-1671.
51. Nye JA, Schuster DM, Yu W, Camp VM, Goodman MM, Votaw JR. Biodistribution and radiation dosimetry of the synthetic nonmetabolized amino acid analogue anti-18F-FACBC in humans. *J Nucl Med.* 2007;48:1017-1020.
52. McParland BJ, Wall A, Johansson S, Sorensen J. The clinical safety, biodistribution and internal radiation dosimetry of [(1)(8)F]fluciclovine in healthy adult volunteers. *Eur J Nucl Med Mol Imaging.* 2013;40:1256-1264.
53. Xu X, Zhu H, Liu F, et al. Dynamic PET/CT imaging of (18)F-(2S, 4R)4-fluoroglutamine in healthy volunteers and oncological patients. *Eur J Nucl Med Mol Imaging.* 2020.
54. Venneti S, Dunphy MP, Zhang H, et al. Glutamine-based PET imaging facilitates enhanced metabolic evaluation of gliomas in vivo. *Sci Transl Med.* 2015;7:274ra217.
55. Kimura Y, Simeon FG, Hatazawa J, et al. Biodistribution and radiation dosimetry of a positron emission tomographic ligand, 18F-SP203, to image metabotropic glutamate subtype 5 receptors in humans. *Eur J Nucl Med Mol Imaging.* 2010;37:1943-1949.

Table 4: Effective dose extrapolated from monkeys and measured directly in humans, and their relative difference.

|                              | Effective dose from monkeys<br>( $\mu\text{Sv}/\text{MBq}$ ) | Effective dose from humans<br>( $\mu\text{Sv}/\text{MBq}$ ) | % difference compared to the human dose | References         |
|------------------------------|--------------------------------------------------------------|-------------------------------------------------------------|-----------------------------------------|--------------------|
| <b><sup>11</sup>C Tracer</b> |                                                              |                                                             |                                         |                    |
| Rolipram                     | 6.6                                                          | 4.8                                                         | 38                                      | (1)                |
| DASB                         | 6                                                            | 7                                                           | -14                                     | (2,3)              |
| PBR28                        | 10.3                                                         | 6.6                                                         | 56                                      | (4)                |
| CUMI-101                     | 6.9                                                          | 5.3                                                         | 30                                      | (5); Parsey unpubl |
| MePPEP                       | 6.6                                                          | 4.6                                                         | 43                                      | (6); NIMH data     |
| dLop                         | 9.4                                                          | 7.8                                                         | 21                                      | (7,8)              |
| PK11195                      | 5.3                                                          | 5.1                                                         | 4                                       | (9,10); NIMH data  |
|                              |                                                              | 4.6 <sup>a</sup>                                            | N/A                                     |                    |
| Raclopride                   | 6.7                                                          | 6.3                                                         | 6                                       | (11-13)            |
|                              |                                                              | 6.7                                                         | 0                                       |                    |
| GSK931145                    | 5.2                                                          | 4.5                                                         | 16                                      | (14)               |
| NNC112                       | 3.9                                                          | 5.7                                                         | -32                                     | (15,16)            |
| Erlotinib                    | 3.7                                                          | 3.6                                                         | 3                                       | (17)               |
| MK-8278                      | 4.8                                                          | 5.4                                                         | 11                                      | (18)               |
| PHNO                         | 5                                                            | 4.5                                                         | 11                                      | (19,20)            |
| Pib                          | 7.4                                                          | 4.7                                                         | 57                                      | (21-23)            |
|                              |                                                              | 5.3                                                         | 40                                      |                    |
| NOP1                         | 5                                                            | 4.3                                                         | 16                                      | (24,25)            |
| UCB-J                        | 3.3                                                          | 7.6                                                         | -57                                     | (26,27)            |
| <b><sup>18</sup>F Tracer</b> |                                                              |                                                             |                                         |                    |
| FMPEP-d2                     | 25.1                                                         | 19.7                                                        | 27                                      | (6); NIMH data     |
| RGD-K5                       | 40                                                           | 31                                                          | 29                                      | (28)               |
| FPEB                         | 23.7                                                         | 16.9                                                        | 98 <sup>b</sup>                         | (29-32)            |
|                              |                                                              | 33.5                                                        | 25                                      |                    |
| SP203                        | 27                                                           | 17.8                                                        | 52                                      | (33); NIMH data    |

|                   |                   |      |     |                 |
|-------------------|-------------------|------|-----|-----------------|
| BMS747158         | 15                | 19   | -21 | (34,35)         |
| PBR06             | 30.3              | 18.5 | 64  | (36); NIMH data |
| Fluoropaclitaxel  | 22                | 28.8 | -24 | (37,38)         |
| PF-06684511       | 43                | 24.7 | 74  | (39,40)         |
| AV1451 (T807)     | 18.9              | 22.5 | -16 | (41,42)         |
| Fluortriopride    | 20 <sup>c</sup>   | 22.5 | -11 | (43,44)         |
| FE-PE2I           | 21                | 23   | -9  | (45,46)         |
| Tetrafluoroborate | 24.7              | 50   | -51 | (47-49)         |
|                   |                   | 32.6 | -24 |                 |
| PF-05270430       | 21.7              | 34.9 | -38 | (50,51)         |
|                   | 24.9              |      | -29 |                 |
| VAT               | 17.5              | 12   | 46  | (52,53)         |
| FIMX              | 25.4              | 23.4 | 9   | (54); NIMH data |
| MNI-444           | 21.9 <sup>d</sup> | 23.1 | -5  | (55,56)         |
| LMI1195           | 18.9              | 26   | -27 | (57,58)         |
| MNI-659           | 19.7              | 24.1 | -18 | (31,59)         |
| HX4               | 42                | 27   | 56  | (60)            |
| FMeNER-D2         | 33.2              | 17   | 95  | (61,62)         |
| LSN3316612        | 22                | 20.5 | 7   | (63,64)         |

<sup>a</sup> Effective dose equivalent (10). By consequence, the comparison with the ED from monkeys is not calculated.

<sup>b</sup> Largest difference between the two monkey studies (31,32) and the two human studies (29,30).

<sup>c</sup> Different values of effective dose extrapolated from monkeys are given (44). We chose the one that is the closest to the human dose (43).

<sup>d</sup> Two different ED values were estimated with two different approaches. We report here the one (Scaled Monkey Organ Weight) that gives the closest approximation to human data (+5%). The other approach (No Correction for Organ Weight Difference) would have given a difference of -23% (55).



## References

1. Sprague DR, Fujita M, Ryu YH, Liow JS, Pike VW, Innis RB. Whole-body biodistribution and radiation dosimetry in monkeys and humans of the phosphodiesterase 4 radioligand [(11)C](R)-rolipram: comparison of two-dimensional planar, bisected and quadrisectioned image analyses. *Nucl Med Biol.* 2008;35:493-500.
2. Lu JQ, Ichise M, Liow JS, Ghose S, Vines D, Innis RB. Biodistribution and radiation dosimetry of the serotonin transporter ligand 11C-DASB determined from human whole-body PET. *J Nucl Med.* 2004;45:1555-1559.
3. Tiple DN, Lu J-Q, Fujita M, Ichise M, Vines D, Innis RB. Radiation dosimetry estimates for the PET serotonin transporter probe [<sup>11</sup>C]DASB determined from whole-body imaging in nonhuman primates. *Nucl Med Comm.* 2004;25:81-86.
4. Brown AK, Fujita M, Fujimura Y, et al. Radiation dosimetry and biodistribution in monkey and man of 11C-PBR28: a PET radioligand to image inflammation. *J Nucl Med.* 2007;48:2072-2079.
5. Hines CS, Liow J-S, Zanotti-Fregonara P, et al. Human biodistribution and dosimetry of 11C-CUMI-101, an agonist radioligand for serotonin-1A receptors in brain. *PLoS one.* 2011;6:e25309.
6. Terry GE, Hirvonen J, Liow JS, et al. Biodistribution and dosimetry in humans of two inverse agonists to image cannabinoid CB1 receptors using positron emission tomography. *Eur J Nucl Med Mol Imaging.* 2010;37:1499-1506.
7. Liow JS, Kreisl W, Zoghbi SS, et al. P-glycoprotein function at the blood-brain barrier imaged using 11C-N-desmethyl-loperamide in monkeys. *J Nucl Med.* 2009;50:108-115.
8. Seneca N, Zoghbi SS, Liow JS, et al. Human brain imaging and radiation dosimetry of 11C-N-desmethyl-loperamide, a PET radiotracer to measure the function of P-glycoprotein. *J Nucl Med.* 2009;50:807-813.
9. Hirvonen J, Roivainen A, Virta J, Helin S, Nagren K, Rinne JO. Human biodistribution and radiation dosimetry of 11C-(R)-PK11195, the prototypic PET ligand to image inflammation. *Eur J Nucl Med Mol Imaging.* 2010;37:606-612.
10. Kumar A, Muzik O, Chugani D, Chakraborty P, Chugani HT. PET-derived biodistribution and dosimetry of the benzodiazepine receptor-binding radioligand (11)C-(R)-PK11195 in children and adults. *J Nucl Med.* 2010;51:139-144.
11. Ribeiro MJ, Ricard M, Bourgeois S, et al. Biodistribution and radiation dosimetry of [11C]raclopride in healthy volunteers. *Eur J Nucl Med Mol Imaging.* 2005;32:952-958.

12. Slifstein M, Hwang DR, Martinez D, et al. Biodistribution and radiation dosimetry of the dopamine D2 ligand 11C-raclopride determined from human whole-body PET. *J Nucl Med.* 2006;47:313-319.
13. Herscovitch P, Schmall B, Doudet DJ, Carson RE, Eckelman WC. Biodistribution and radiation dose estimates for [C-11]raclopride. *Journal of Nuclear Medicine.* 1997;38:951-951.
14. Bullich S, Slifstein M, Passchier J, et al. Biodistribution and radiation dosimetry of the glycine transporter-1 ligand 11C-GSK931145 determined from primate and human whole-body PET. *Mol Imaging Biol.* 2011;13:776-784.
15. Cropley VL, Fujita M, Musachio JL, et al. Whole-body biodistribution and estimation of radiation-absorbed doses of the dopamine D1 receptor radioligand 11C-NNC 112 in humans. *J Nucl Med.* 2006;47:100-104.
16. Moerlein S, Laforest R, Antenor J, Permuter J. Absorbed radiation dosimetry of the D1 ligand 11C-NNC 112 as determined by whole-body PET imaging of baboons. *Journal of Nuclear Medicine.* 2006;47:494P.
17. Petrulli JR, Hansen SB, Abourbeh G, et al. A multi species evaluation of the radiation dosimetry of [(11)C]erlotinib, the radiolabeled analog of a clinically utilized tyrosine kinase inhibitor. *Nucl Med Biol.* 2017;47:56-61.
18. Van Laere KJ, Sanabria-Bohorquez SM, Mozley DP, et al. (11)C-MK-8278 PET as a tool for pharmacodynamic brain occupancy of histamine 3 receptor inverse agonists. *J Nucl Med.* 2014;55:65-72.
19. Gallezot J-D, Beaver J, Nabulsi N, et al. [11C]PHNO studies in rhesus monkey: In vivo affinity for D2 and D3 receptors and dosimetry. *Journal of Nuclear Medicine.* 2009;50:601.
20. Mizrahi R, Rusjan P, Vitcu I, et al. Whole-body distribution and radiation dosimetry of 11C-(+)-PHNO, a D2/3 agonist ligand. *J Nucl Med.* 2012;53:1802-1806.
21. Parsey RV, Sokol LO, Belanger MJ, et al. Amyloid plaque imaging agent [C-11]-6-OH-BTA-1: biodistribution and radiation dosimetry in baboon. *Nucl Med Commun.* 2005;26:875-880.
22. O'Keefe GJ, Saunderson TH, Ng S, et al. Radiation dosimetry of beta-amyloid tracers 11C-PiB and 18F-BAY94-9172. *J Nucl Med.* 2009;50:309-315.
23. Scheinin NM, Tolvanen TK, Wilson IA, Arponen EM, Nagren KA, Rinne JO. Biodistribution and radiation dosimetry of the amyloid imaging agent 11C-PIB in humans. *J Nucl Med.* 2007;48:128-133.

24. Lohith TG, Zoghbi SS, Morse CL, et al. Brain and whole-body imaging of nociceptin/orphanin FQ peptide receptor in humans using the PET ligand 11C-NOP-1A. *J Nucl Med.* 2012;53:385-392.
25. Kimura Y, Fujita M, Hong J, et al. Brain and whole-body imaging in rhesus monkeys of 11C-NOP-1A, a promising PET radioligand for nociceptin/orphanin FQ peptide receptors. *J Nucl Med.* 2011;52:1638-1645.
26. Bini J, Holden D, Fontaine K, et al. Human adult and adolescent biodistribution and dosimetry of the synaptic vesicle glycoprotein 2A radioligand 11C-UCB-J. *EJNMMI Research.* 2020;10:83.
27. Nabulsi NB, Mercier J, Holden D, et al. Synthesis and Preclinical Evaluation of 11C-UCB-J as a PET Tracer for Imaging the Synaptic Vesicle Glycoprotein 2A in the Brain. *J Nucl Med.* 2016;57:777-784.
28. Doss M, Kolb HC, Zhang JJ, et al. Biodistribution and radiation dosimetry of the integrin marker 18F-RGD-K5 determined from whole-body PET/CT in monkeys and humans. *J Nucl Med.* 2012;53:787-795.
29. Kessler RM, Seibyl J, Cowan RL, et al. Radiation Dosimetry of (18)F-FPEB in Humans. *J Nucl Med.* 2014;55:1119-1121.
30. Wong DF, Waterhouse R, Kuwabara H, et al. 18F-FPEB, a PET radiopharmaceutical for quantifying metabotropic glutamate 5 receptors: a first-in-human study of radiochemical safety, biokinetics, and radiation dosimetry. *J Nucl Med.* 2013;54:388-396.
31. Constantinescu C, Barret O, Tavares A, et al. A comparative study between whole-body dosimetry estimates of [18F]FPEB, [18F]MNI-659, and [18F]MNI-444 in non-human primates and humans. *Journal of Nuclear Medicine.* 2015;56:1016.
32. Bélanger MJ, Krause SM, Ryan C, et al. Biodistribution and radiation dosimetry of [18F]F-PEB in nonhuman primates. *Nucl Med Commun.* 2008;29:915-919.
33. Kimura Y, Simeon FG, Hatazawa J, et al. Biodistribution and radiation dosimetry of a positron emission tomographic ligand, 18F-SP203, to image metabotropic glutamate subtype 5 receptors in humans. *Eur J Nucl Med Mol Imaging.* 2010;37:1943-1949.
34. Maddahi J, Czernin J, Lazewatsky J, et al. Phase I, first-in-human study of BMS747158, a novel 18F-labeled tracer for myocardial perfusion PET: dosimetry, biodistribution, safety, and imaging characteristics after a single injection at rest. *J Nucl Med.* 2011;52:1490-1498.

- 35.** Lazewatsky J, Azure M, Guaraldi M, et al. Dosimetry of BMS747158, a novel <sup>18</sup>F labeled tracer for myocardial perfusion imaging, in nonhuman primates at rest. *Journal of Nuclear Medicine*. 2008;49:15P.
- 36.** Fujimura Y, Kimura Y, Simeon FG, et al. Biodistribution and radiation dosimetry in humans of a new PET ligand, (18)F-PBR06, to image translocator protein (18 kDa). *J Nucl Med*. 2010;51:145-149.
- 37.** Kurdziel KA, Kalen JD, Hirsch JI, et al. Human dosimetry and preliminary tumor distribution of <sup>18</sup>F-fluoropaclitaxel in healthy volunteers and newly diagnosed breast cancer patients using PET/CT. *J Nucl Med*. 2011;52:1339-1345.
- 38.** Kurdziel KA, Kiesewetter DO, Carson RE, Eckelman WC, Herscovitch P. Biodistribution, Radiation Dose Estimates, and In Vivo Pgp Modulation Studies of <sup>18</sup>F-Paclitaxel in Nonhuman Primates. *Journal of Nuclear Medicine*. 2003;44:1330-1339.
- 39.** Arakawa R, Takano A, Stenkrona P, et al. PET imaging of beta-secretase 1 in the human brain: radiation dosimetry, quantification, and test-retest examination of [<sup>18</sup>F]PF-06684511. *European Journal of Nuclear Medicine and Molecular Imaging*. 2020.
- 40.** Takano A, Chen L, Nag S, et al. Quantitative Analysis of <sup>18</sup>F-PF-06684511, a Novel PET Radioligand for Selective  $\beta$ -Secretase 1 Imaging, in Nonhuman Primate Brain. *Journal of Nuclear Medicine*. 2019;60:992-997.
- 41.** Choi JY, Lyoo CH, Lee JH, et al. Human Radiation Dosimetry of [(18)F]AV-1451(T807) to Detect Tau Pathology. *Mol Imaging Biol*. 2016;18:479-482.
- 42.** Huang YY, Chiu MJ, Yen RF, et al. An one-pot two-step automated synthesis of [<sup>18</sup>F]T807 injection, its biodistribution in mice and monkeys, and a preliminary study in humans. *PLoS One*. 2019;14:e0217384.
- 43.** Doot RK, Dubroff JG, Scheuermann JS, et al. Validation of gallbladder absorbed radiation dose reduction simulation: human dosimetry of [(18)F]fluortriopride. *EJNMMI Phys*. 2018;5:21.
- 44.** Laforest R, Karimi M, Moerlein SM, et al. Absorbed radiation dosimetry of the D3-specific PET radioligand [(18)F]FluorTriopride estimated using rodent and nonhuman primate. *Am J Nucl Med Mol Imaging*. 2016;6:301-309.
- 45.** Lizana H, Johansson L, Axelsson J, et al. Whole-Body Biodistribution and Dosimetry of the Dopamine Transporter Radioligand (18)F-FE-PE2I in Human Subjects. *J Nucl Med*. 2018;59:1275-1280.

46. Varrone A, Gulyas B, Takano A, Stabin MG, Jonsson C, Halldin C. Simplified quantification and whole-body distribution of [18F]FE-PE2I in nonhuman primates: prediction for human studies. *Nucl Med Biol.* 2012;39:295-303.
47. Jiang H, Schmit NR, Koenen AR, et al. Safety, pharmacokinetics, metabolism and radiation dosimetry of (18)F-tetrafluoroborate ((18)F-TFB) in healthy human subjects. *EJNMMI Res.* 2017;7:90.
48. Marti-Climent JM, Collantes M, Jauregui-Osoro M, et al. Radiation dosimetry and biodistribution in non-human primates of the sodium/iodide PET ligand [(18)F]-tetrafluoroborate. *EJNMMI Res.* 2015;5:70.
49. O'Doherty J, Jauregui-Osoro M, Brothwood T, et al. (18)F-Tetrafluoroborate, a PET Probe for Imaging Sodium/Iodide Symporter Expression: Whole-Body Biodistribution, Safety, and Radiation Dosimetry in Thyroid Cancer Patients. *J Nucl Med.* 2017;58:1666-1671.
50. Constantinescu C, Cole P, Brown T, et al. Radiation dosimetry and biodistribution of [18F]PF-05270430, a radiotracer for phosphodiesterase 2A (PDE2A) in rhesus macaques and humans. *Journal of Nuclear Medicine.* 2018;59:1012.
51. Naganawa M, Waterhouse RN, Nabulsi N, et al. First-in-Human Assessment of the Novel PDE2A PET Radiotracer 18F-PF-05270430. *J Nucl Med.* 2016;57:1388-1395.
52. Karimi M, Tu Z, Yue X, et al. Radiation dosimetry of [(18)F]VAT in nonhuman primates. *EJNMMI Res.* 2015;5:73.
53. Laforest R, Lui H, HUsain J, Cummings K, Perlmutter J, Tu Z. Radiation Dosimetry on 18F-VAT in human. *Journal of Nuclear Medicine.* 2018;59:1002.
54. Zanotti-Fregonara P, Xu R, Zoghbi SS, et al. The PET Radioligand 18F-FIMX Images and Quantifies Metabotropic Glutamate Receptor 1 in Proportion to the Regional Density of Its Gene Transcript in Human Brain. *J Nucl Med.* 2016;57:242-247.
55. Barret O, Hannestad J, Alagille D, et al. Adenosine 2A Receptor Occupancy by Tozadenant and Preladenant in Rhesus Monkeys. *Journal of Nuclear Medicine.* 2014;55:1712-1718.
56. Barret O, Hannestad J, Vala C, et al. Characterization in humans of 18F-MNI-444, a PET radiotracer for brain adenosine 2A receptors. *J Nucl Med.* 2015;56:586-591.
57. Mistry M, Kagan M, Lazewatsky J, et al. Dosimetry in nonhuman primates of [18F]LMI1195, a novel PET tracer for imaging the cardiac sympathetic nervous system. *Journal of Nuclear Medicine.* 2010;51:1447.

- 58.** Sinusas AJ, Lazewatsky J, Brunetti J, et al. Biodistribution and radiation dosimetry of LMI1195: first-in-human study of a novel 18F-labeled tracer for imaging myocardial innervation. *J Nucl Med.* 2014;55:1445-1451.
- 59.** Barret O, Thomae D, Tavares A, et al. In vivo assessment and dosimetry of 2 novel PDE10A PET radiotracers in humans: 18F-MNI-659 and 18F-MNI-654. *J Nucl Med.* 2014;55:1297-1304.
- 60.** Doss M, Zhang JJ, Belanger MJ, et al. Biodistribution and radiation dosimetry of the hypoxia marker 18F-HX4 in monkeys and humans determined by using whole-body PET/CT. *Nucl Med Commun.* 2010;31:1016-1024.
- 61.** Seneca N, Andree B, Sjöholm N, et al. Whole-body biodistribution, radiation dosimetry estimates for the PET norepinephrine transporter probe (S,S)-[18F]FMeNER-D2 in non-human primates. *Nucl Med Commun.* 2005;26:695-700.
- 62.** Takano A, Halldin C, Varrone A, et al. Biodistribution and radiation dosimetry of the norepinephrine transporter radioligand (S,S)-[18F]FMeNER-D2: a human whole-body PET study. *Eur J Nucl Med Mol Imaging.* 2008;35:630-636.
- 63.** Lee JH, Liow JS, Paul S, et al. PET quantification of brain O-GlcNAcase with [(18)F]LSN3316612 in healthy human volunteers. *EJNMMI Res.* 2020;10:20.
- 64.** Paul S, Haskali MB, Liow JS, et al. Evaluation of a PET Radioligand to Image O-GlcNAcase in Brain and Periphery of Rhesus Monkey and Knock-Out Mouse. *J Nucl Med.* 2019;60:129-134.

Table 5: Target organs in monkeys and humans for the same tracers. The doses and their differences are reported only for the 11 tracers for which monkey and human data identified the same target organ

|                              | Target organ from monkeys        | Dose from monkeys (μSv/MBq) | Target organ from humans           | Dose from humans (μSv/MBq) | % difference in organ dose compared to the human dose | References         |
|------------------------------|----------------------------------|-----------------------------|------------------------------------|----------------------------|-------------------------------------------------------|--------------------|
| <b><sup>11</sup>C Tracer</b> |                                  |                             |                                    |                            |                                                       |                    |
| Rolipram                     | Bladder                          |                             | Gallbladder                        |                            |                                                       | (1)                |
| DASB                         | Bladder                          |                             | Lungs                              |                            |                                                       | (2,3)              |
| PBR28                        | Lungs                            |                             | Kidney                             |                            |                                                       | (4)                |
| CUMI-101                     | Bladder                          |                             | Pancreas                           |                            |                                                       | (5); Parsey unpubl |
| MePPEP                       | N/A                              |                             | Liver                              |                            |                                                       | (6); NIMH data     |
| dLop                         | Thyroid                          |                             | Kidney                             |                            |                                                       | (7,8)              |
| PK11195                      | N/A                              |                             | Kidney<br>Bladder                  |                            |                                                       | (9,10); NIMH data  |
| Raclopride                   | Gallbladder                      |                             | Gallbladder<br>Kidney              |                            |                                                       | (11-13)            |
| GSK931145                    | Liver                            | 18.1                        | Liver                              | 11.5                       | 57                                                    | (14)               |
| NNC112                       | Kidney                           |                             | Gallbladder                        |                            |                                                       | (15,16)            |
| Erlotinib                    | Liver                            | 17.4                        | Liver                              | 29.4                       | -41                                                   | (17)               |
| MK-8278                      | N/A                              |                             | Pancreas                           |                            |                                                       | (18)               |
| PHNO                         | Kidney                           |                             | Liver                              |                            |                                                       | (19,20)            |
| Pib                          | Gallbladder                      | 41                          | Gallbladder<br>Gallbladder         | 41.5<br>44.8               | -1<br>-8                                              | (21-23)            |
| NOP1                         | Gallbladder                      | 35.6                        | Gallbladder                        | 21                         | 70                                                    | (24,25)            |
| UCB-J                        | Liver (males)<br>Brain (females) |                             | Bladder (males)<br>Liver (females) |                            |                                                       | (26,27)            |
| <b><sup>18</sup>F Tracer</b> |                                  |                             |                                    |                            |                                                       |                    |
| FMPEP-d2                     | Bladder                          | 135                         | Bladder                            | 66.2                       | 104                                                   | (6); NIMH data     |
| RGD-K5                       | Bladder                          | 400                         | Bladder                            | 376                        | 6                                                     | (28)               |
| FPEB                         | Gallbladder<br>Upper intestine   |                             | Gallbladder<br>Bladder             |                            |                                                       | (29-32)            |

|                   |                            |      |                                        |       |     |                 |
|-------------------|----------------------------|------|----------------------------------------|-------|-----|-----------------|
| SP203             | N/A                        |      | Bladder                                |       |     | (33); NIMH data |
| BMS747158         | Heart                      |      | Kidney                                 |       |     | (34,35)         |
| PBR06             | Gallbladder                | 199  | Gallbladder                            | 367   | -46 | (36); NIMH data |
| Fluoropaclitaxel  | Gallbladder                | 190  | Gallbladder                            | 229.5 | -17 | (37,38)         |
| PF-06684511       | N/A                        |      | Pancreas                               |       |     | (39,40)         |
| AV1451 (T807)     | Kidney                     |      | Liver                                  |       |     | (41,42)         |
| Fluortriopride    | Gallbladder                | 18.1 | Gallbladder                            | 436   | -96 | (43,44)         |
| FE-PE2I           | Upper intestine            |      | Bladder                                |       |     | (45,46)         |
| Tetrafluoroborate | Stomach                    |      | Thyroid<br>Thyroid                     |       |     | (47-49)         |
| PF-05270430       | Gallbladder<br>Gallbladder |      | GI Tract (males),<br>Bladder (females) |       |     | (50,51)         |
| VAT               | Liver                      |      | Gallbladder                            |       |     | (52,53)         |
| FIMX              | Bone                       |      | Bladder                                |       |     | (54); NIMH data |
| MNI-444           | Gallbladder                |      | Upper intestine                        |       |     | (55,56)         |
| LMI1195           | Bladder                    | 100  | Bladder                                | 101.5 | -1  | (57,58)         |
| MNI-659           | Digestive tract            |      | Gallbladder                            |       |     | (31,59)         |
| HX4               | Bladder                    | 42   | Bladder                                | 27    | 56  | (60)            |
| FMeNER-D2         | Kidney                     |      | Bladder                                |       |     | (61,62)         |
| LSN3316612        | Kidney                     |      | Bladder                                |       |     | (63,64)         |

The organ doses of three tracers are not listed: <sup>18</sup>F-FPEB, <sup>11</sup>C-raclopride, and <sup>11</sup>C-UCB-J

The dose for <sup>18</sup>F-FPEB has been estimated twice in rhesus monkeys (31,32) and twice in humans (29,30). The target organ was identified as either the gallbladder (31) or the upper large intestine (32) in monkeys and as either the gallbladder (30) or the bladder (29) in humans.

For <sup>11</sup>C-raclopride, the gallbladder was identified as the target organ in monkeys by Herscovitch et al (13) and in humans by Slifstein et al (12).

However, Ribeiro et al identified the kidneys as the target organ (11). Notably, the kidney dose of 40.6  $\mu$ Sv/MBq estimated by Ribeiro et al (11) is about one order of magnitude greater than the kidney dose estimated by Slifstein et al. at 6.8  $\mu$ Sv/MBq (12).

Since multiple studies are more likely to find at least one common target organ, these organ doses have not been included in the table.

Similarly, <sup>11</sup>C-UCB-J has two different target organs for males and females for both monkeys and humans. The only common organ is the liver, which is the target organ for male monkeys and women.



## References

1. Sprague DR, Fujita M, Ryu YH, Liow JS, Pike VW, Innis RB. Whole-body biodistribution and radiation dosimetry in monkeys and humans of the phosphodiesterase 4 radioligand [(11)C](R)-rolipram: comparison of two-dimensional planar, bisected and quadrisected image analyses. *Nucl Med Biol.* 2008;35:493-500.
2. Lu JQ, Ichise M, Liow JS, Ghose S, Vines D, Innis RB. Biodistribution and radiation dosimetry of the serotonin transporter ligand 11C-DASB determined from human whole-body PET. *J Nucl Med.* 2004;45:1555-1559.
3. Tiple DN, Lu J-Q, Fujita M, Ichise M, Vines D, Innis RB. Radiation dosimetry estimates for the PET serotonin transporter probe [<sup>11</sup>C]DASB determined from whole-body imaging in nonhuman primates. *Nucl Med Comm.* 2004;25:81-86.
4. Brown AK, Fujita M, Fujimura Y, et al. Radiation dosimetry and biodistribution in monkey and man of 11C-PBR28: a PET radioligand to image inflammation. *J Nucl Med.* 2007;48:2072-2079.
5. Hines CS, Liow J-S, Zanotti-Fregonara P, et al. Human biodistribution and dosimetry of 11C-CUMI-101, an agonist radioligand for serotonin-1A receptors in brain. *PLoS one.* 2011;6:e25309.
6. Terry GE, Hirvonen J, Liow JS, et al. Biodistribution and dosimetry in humans of two inverse agonists to image cannabinoid CB1 receptors using positron emission tomography. *Eur J Nucl Med Mol Imaging.* 2010;37:1499-1506.
7. Liow JS, Kreisl W, Zoghbi SS, et al. P-glycoprotein function at the blood-brain barrier imaged using 11C-N-desmethyl-loperamide in monkeys. *J Nucl Med.* 2009;50:108-115.
8. Seneca N, Zoghbi SS, Liow JS, et al. Human brain imaging and radiation dosimetry of 11C-N-desmethyl-loperamide, a PET radiotracer to measure the function of P-glycoprotein. *J Nucl Med.* 2009;50:807-813.
9. Hirvonen J, Roivainen A, Virta J, Helin S, Nagren K, Rinne JO. Human biodistribution and radiation dosimetry of 11C-(R)-PK11195, the prototypic PET ligand to image inflammation. *Eur J Nucl Med Mol Imaging.* 2010;37:606-612.
10. Kumar A, Muzik O, Chugani D, Chakraborty P, Chugani HT. PET-derived biodistribution and dosimetry of the benzodiazepine receptor-binding radioligand (11)C-(R)-PK11195 in children and adults. *J Nucl Med.* 2010;51:139-144.
11. Ribeiro MJ, Ricard M, Bourgeois S, et al. Biodistribution and radiation dosimetry of [11C]raclopride in healthy volunteers. *Eur J Nucl Med Mol Imaging.* 2005;32:952-958.

12. Slifstein M, Hwang DR, Martinez D, et al. Biodistribution and radiation dosimetry of the dopamine D2 ligand 11C-raclopride determined from human whole-body PET. *J Nucl Med.* 2006;47:313-319.
13. Herscovitch P, Schmall B, Doudet DJ, Carson RE, Eckelman WC. Biodistribution and radiation dose estimates for [C-11]raclopride. *Journal of Nuclear Medicine.* 1997;38:951-951.
14. Bullich S, Slifstein M, Passchier J, et al. Biodistribution and radiation dosimetry of the glycine transporter-1 ligand 11C-GSK931145 determined from primate and human whole-body PET. *Mol Imaging Biol.* 2011;13:776-784.
15. Cropley VL, Fujita M, Musachio JL, et al. Whole-body biodistribution and estimation of radiation-absorbed doses of the dopamine D1 receptor radioligand 11C-NNC 112 in humans. *J Nucl Med.* 2006;47:100-104.
16. Moerlein S, Laforest R, Antenor J, Permuter J. Absorbed radiation dosimetry of the D1 ligand 11C-NNC 112 as determined by whole-body PET imaging of baboons. *Journal of Nuclear Medicine.* 2006;47:494P.
17. Petrulli JR, Hansen SB, Abourbeh G, et al. A multi species evaluation of the radiation dosimetry of [(11)C]erlotinib, the radiolabeled analog of a clinically utilized tyrosine kinase inhibitor. *Nucl Med Biol.* 2017;47:56-61.
18. Van Laere KJ, Sanabria-Bohorquez SM, Mozley DP, et al. (11)C-MK-8278 PET as a tool for pharmacodynamic brain occupancy of histamine 3 receptor inverse agonists. *J Nucl Med.* 2014;55:65-72.
19. Gallezot J-D, Beaver J, Nabulsi N, et al. [11C]PHNO studies in rhesus monkey: In vivo affinity for D2 and D3 receptors and dosimetry. *Journal of Nuclear Medicine.* 2009;50:601.
20. Mizrahi R, Rusjan P, Vitcu I, et al. Whole-body distribution and radiation dosimetry of 11C-(+)-PHNO, a D2/3 agonist ligand. *J Nucl Med.* 2012;53:1802-1806.
21. Parsey RV, Sokol LO, Belanger MJ, et al. Amyloid plaque imaging agent [C-11]-6-OH-BTA-1: biodistribution and radiation dosimetry in baboon. *Nucl Med Commun.* 2005;26:875-880.
22. O'Keefe GJ, Saunderson TH, Ng S, et al. Radiation dosimetry of beta-amyloid tracers 11C-PiB and 18F-BAY94-9172. *J Nucl Med.* 2009;50:309-315.
23. Scheinin NM, Tolvanen TK, Wilson IA, Arponen EM, Nagren KA, Rinne JO. Biodistribution and radiation dosimetry of the amyloid imaging agent 11C-PIB in humans. *J Nucl Med.* 2007;48:128-133.

24. Lohith TG, Zoghbi SS, Morse CL, et al. Brain and whole-body imaging of nociceptin/orphanin FQ peptide receptor in humans using the PET ligand 11C-NOP-1A. *J Nucl Med.* 2012;53:385-392.
25. Kimura Y, Fujita M, Hong J, et al. Brain and whole-body imaging in rhesus monkeys of 11C-NOP-1A, a promising PET radioligand for nociceptin/orphanin FQ peptide receptors. *J Nucl Med.* 2011;52:1638-1645.
26. Bini J, Holden D, Fontaine K, et al. Human adult and adolescent biodistribution and dosimetry of the synaptic vesicle glycoprotein 2A radioligand 11C-UCB-J. *EJNMMI Research.* 2020;10:83.
27. Nabulsi NB, Mercier J, Holden D, et al. Synthesis and Preclinical Evaluation of 11C-UCB-J as a PET Tracer for Imaging the Synaptic Vesicle Glycoprotein 2A in the Brain. *J Nucl Med.* 2016;57:777-784.
28. Doss M, Kolb HC, Zhang JJ, et al. Biodistribution and radiation dosimetry of the integrin marker 18F-RGD-K5 determined from whole-body PET/CT in monkeys and humans. *J Nucl Med.* 2012;53:787-795.
29. Kessler RM, Seibyl J, Cowan RL, et al. Radiation Dosimetry of (18)F-FPEB in Humans. *J Nucl Med.* 2014;55:1119-1121.
30. Wong DF, Waterhouse R, Kuwabara H, et al. 18F-FPEB, a PET radiopharmaceutical for quantifying metabotropic glutamate 5 receptors: a first-in-human study of radiochemical safety, biokinetics, and radiation dosimetry. *J Nucl Med.* 2013;54:388-396.
31. Constantinescu C, Barret O, Tavares A, et al. A comparative study between whole-body dosimetry estimates of [18F]FPEB, [18F]MNI-659, and [18F]MNI-444 in non-human primates and humans. *Journal of Nuclear Medicine.* 2015;56:1016.
32. Bélanger MJ, Krause SM, Ryan C, et al. Biodistribution and radiation dosimetry of [18F]F-PEB in nonhuman primates. *Nucl Med Commun.* 2008;29:915-919.
33. Kimura Y, Simeon FG, Hatazawa J, et al. Biodistribution and radiation dosimetry of a positron emission tomographic ligand, 18F-SP203, to image metabotropic glutamate subtype 5 receptors in humans. *Eur J Nucl Med Mol Imaging.* 2010;37:1943-1949.
34. Maddahi J, Czernin J, Lazewatsky J, et al. Phase I, first-in-human study of BMS747158, a novel 18F-labeled tracer for myocardial perfusion PET: dosimetry, biodistribution, safety, and imaging characteristics after a single injection at rest. *J Nucl Med.* 2011;52:1490-1498.

- 35.** Lazewatsky J, Azure M, Guaraldi M, et al. Dosimetry of BMS747158, a novel <sup>18</sup>F labeled tracer for myocardial perfusion imaging, in nonhuman primates at rest. *Journal of Nuclear Medicine*. 2008;49:15P.
- 36.** Fujimura Y, Kimura Y, Simeon FG, et al. Biodistribution and radiation dosimetry in humans of a new PET ligand, (18)F-PBR06, to image translocator protein (18 kDa). *J Nucl Med*. 2010;51:145-149.
- 37.** Kurdziel KA, Kalen JD, Hirsch JI, et al. Human dosimetry and preliminary tumor distribution of <sup>18</sup>F-fluoropaclitaxel in healthy volunteers and newly diagnosed breast cancer patients using PET/CT. *J Nucl Med*. 2011;52:1339-1345.
- 38.** Kurdziel KA, Kiesewetter DO, Carson RE, Eckelman WC, Herscovitch P. Biodistribution, Radiation Dose Estimates, and In Vivo Pgp Modulation Studies of <sup>18</sup>F-Paclitaxel in Nonhuman Primates. *Journal of Nuclear Medicine*. 2003;44:1330-1339.
- 39.** Arakawa R, Takano A, Stenkrona P, et al. PET imaging of beta-secretase 1 in the human brain: radiation dosimetry, quantification, and test-retest examination of [<sup>18</sup>F]PF-06684511. *European Journal of Nuclear Medicine and Molecular Imaging*. 2020.
- 40.** Takano A, Chen L, Nag S, et al. Quantitative Analysis of <sup>18</sup>F-PF-06684511, a Novel PET Radioligand for Selective  $\beta$ -Secretase 1 Imaging, in Nonhuman Primate Brain. *Journal of Nuclear Medicine*. 2019;60:992-997.
- 41.** Choi JY, Lyoo CH, Lee JH, et al. Human Radiation Dosimetry of [(18)F]AV-1451(T807) to Detect Tau Pathology. *Mol Imaging Biol*. 2016;18:479-482.
- 42.** Huang YY, Chiu MJ, Yen RF, et al. An one-pot two-step automated synthesis of [<sup>18</sup>F]T807 injection, its biodistribution in mice and monkeys, and a preliminary study in humans. *PLoS One*. 2019;14:e0217384.
- 43.** Doot RK, Dubroff JG, Scheuermann JS, et al. Validation of gallbladder absorbed radiation dose reduction simulation: human dosimetry of [(18)F]fluortriopride. *EJNMMI Phys*. 2018;5:21.
- 44.** Laforest R, Karimi M, Moerlein SM, et al. Absorbed radiation dosimetry of the D3-specific PET radioligand [(18)F]FluorTriopride estimated using rodent and nonhuman primate. *Am J Nucl Med Mol Imaging*. 2016;6:301-309.
- 45.** Lizana H, Johansson L, Axelsson J, et al. Whole-Body Biodistribution and Dosimetry of the Dopamine Transporter Radioligand (18)F-FE-PE2I in Human Subjects. *J Nucl Med*. 2018;59:1275-1280.

46. Varrone A, Gulyas B, Takano A, Stabin MG, Jonsson C, Halldin C. Simplified quantification and whole-body distribution of [18F]FE-PE2I in nonhuman primates: prediction for human studies. *Nucl Med Biol.* 2012;39:295-303.
47. Jiang H, Schmit NR, Koenen AR, et al. Safety, pharmacokinetics, metabolism and radiation dosimetry of (18)F-tetrafluoroborate ((18)F-TFB) in healthy human subjects. *EJNMMI Res.* 2017;7:90.
48. Marti-Climent JM, Collantes M, Jauregui-Osoro M, et al. Radiation dosimetry and biodistribution in non-human primates of the sodium/iodide PET ligand [(18)F]-tetrafluoroborate. *EJNMMI Res.* 2015;5:70.
49. O'Doherty J, Jauregui-Osoro M, Brothwood T, et al. (18)F-Tetrafluoroborate, a PET Probe for Imaging Sodium/Iodide Symporter Expression: Whole-Body Biodistribution, Safety, and Radiation Dosimetry in Thyroid Cancer Patients. *J Nucl Med.* 2017;58:1666-1671.
50. Constantinescu C, Cole P, Brown T, et al. Radiation dosimetry and biodistribution of [18F]PF-05270430, a radiotracer for phosphodiesterase 2A (PDE2A) in rhesus macaques and humans. *Journal of Nuclear Medicine.* 2018;59:1012.
51. Naganawa M, Waterhouse RN, Nabulsi N, et al. First-in-Human Assessment of the Novel PDE2A PET Radiotracer 18F-PF-05270430. *J Nucl Med.* 2016;57:1388-1395.
52. Karimi M, Tu Z, Yue X, et al. Radiation dosimetry of [(18)F]VAT in nonhuman primates. *EJNMMI Res.* 2015;5:73.
53. Laforest R, Lui H, HUsain J, Cummings K, Perlmutter J, Tu Z. Radiation Dosimetry on 18F-VAT in human. *Journal of Nuclear Medicine.* 2018;59:1002.
54. Zanotti-Fregonara P, Xu R, Zoghbi SS, et al. The PET Radioligand 18F-FIMX Images and Quantifies Metabotropic Glutamate Receptor 1 in Proportion to the Regional Density of Its Gene Transcript in Human Brain. *J Nucl Med.* 2016;57:242-247.
55. Barret O, Hannestad J, Alagille D, et al. Adenosine 2A Receptor Occupancy by Tozadenant and Preladenant in Rhesus Monkeys. *Journal of Nuclear Medicine.* 2014;55:1712-1718.
56. Barret O, Hannestad J, Vala C, et al. Characterization in humans of 18F-MNI-444, a PET radiotracer for brain adenosine 2A receptors. *J Nucl Med.* 2015;56:586-591.
57. Mistry M, Kagan M, Lazewatsky J, et al. Dosimetry in nonhuman primates of [18F]LMI1195, a novel PET tracer for imaging the cardiac sympathetic nervous system. *Journal of Nuclear Medicine.* 2010;51:1447.

- 58.** Sinusas AJ, Lazewatsky J, Brunetti J, et al. Biodistribution and radiation dosimetry of LMI1195: first-in-human study of a novel 18F-labeled tracer for imaging myocardial innervation. *J Nucl Med.* 2014;55:1445-1451.
- 59.** Barret O, Thomae D, Tavares A, et al. In vivo assessment and dosimetry of 2 novel PDE10A PET radiotracers in humans: 18F-MNI-659 and 18F-MNI-654. *J Nucl Med.* 2014;55:1297-1304.
- 60.** Doss M, Zhang JJ, Belanger MJ, et al. Biodistribution and radiation dosimetry of the hypoxia marker 18F-HX4 in monkeys and humans determined by using whole-body PET/CT. *Nucl Med Commun.* 2010;31:1016-1024.
- 61.** Seneca N, Andree B, Sjöholm N, et al. Whole-body biodistribution, radiation dosimetry estimates for the PET norepinephrine transporter probe (S,S)-[18F]FMeNER-D2 in non-human primates. *Nucl Med Commun.* 2005;26:695-700.
- 62.** Takano A, Halldin C, Varrone A, et al. Biodistribution and radiation dosimetry of the norepinephrine transporter radioligand (S,S)-[18F]FMeNER-D2: a human whole-body PET study. *Eur J Nucl Med Mol Imaging.* 2008;35:630-636.
- 63.** Lee JH, Liow JS, Paul S, et al. PET quantification of brain O-GlcNAcase with [(18)F]LSN3316612 in healthy human volunteers. *EJNMMI Res.* 2020;10:20.
- 64.** Paul S, Haskali MB, Liow JS, et al. Evaluation of a PET Radioligand to Image O-GlcNAcase in Brain and Periphery of Rhesus Monkey and Knock-Out Mouse. *J Nucl Med.* 2019;60:129-134.
